# Supplementary material for: Differential Roles of Hyperglycemia and Hypoinsulinemia in Diabetes Induced Retinal Cell Death: Evidence for Retinal Insulin Resistance
Source: PLoS One. 2011 Oct 26;6(10):e26498. doi: 10.1371/journal.pone.0026498 (PMC3202547; doi:10.1371/journal.pone.0026498)
Supplement: Table S1 — Retinal transcriptome changes in response to diabetes and their reversal by ocular insulin administration or systemic phloridzin treatment. (XLSX) [file pone.0026498.s001.xlsx]

## Sheet: table 1
p-value	FC Absolute	regulation	Symbol	Entrez_ Gene_ID	Definition	Accession	GI	local insulin	phloridzin	both
0.00835346	1.20033	down	RGD1307041	361182	hypothetical protein FLJ11305 (predicted) (RGD1307041_predicted), mRNA.	XR_009021.1	109504477			✓
0.0175248	1.20097	down	Prkrir	308845	protein-kinase, interferon-inducible double stranded RNA dependent inhibitor, repressor of (P58 repressor) (predicted) (Prkrir_predicted), mRNA.	XM_001065056.1	109462446			✓
0.0443646	1.20594	down	LOC360599	360599	Carbonic anhydrase-related protein 10 (Carbonic anhydrase-related protein X) (CARP X) (CA-RP X) (LOC360599), mRNA.	XM_340878.2	62656781			✓
0.0232624	1.20768	down	RGD1561141	311122	solute carrier family 25 (mitochondrial carrier, Aralar), member 12 (predicted) (RGD1561141_predicted), mRNA.	XR_007837.1	109470073			✓
0.0428736	1.2078	down	Kcnh2	117018	potassium voltage-gated channel, subfamily H (eag-related), member 2 (Kcnh2), mRNA.	NM_053949.1	16758827			✓
0.040071	1.21089	down	Slitrk3	310519	SLIT and NTRK-like family, member 3 (predicted) (Slitrk3_predicted), mRNA.	XM_001068121.1	109466830			✓
0.0131569	1.21287	down	Cant1	246272	calcium activated nucleotidase 1 (Cant1), mRNA.	NM_144754.2	67514567			✓
0.0238951	1.21687	down	Rgs17	308118	regulator of G-protein signaling 17 (predicted) (Rgs17_predicted), mRNA.	XM_217837.4	109457716			✓
0.019348	1.22247	down	Tacr3	24808	tachykinin receptor 3 (Tacr3), mRNA.	NM_017053.1	8394407			✓
0.00973157	1.22611	down	Atp1b1	25650	ATPase, Na+/K+ transporting, beta 1 polypeptide (Atp1b1), mRNA.	NM_013113.1	6978548			✓
0.00208658	1.25037	down	Dnm1	140694	dynamin 1 (Dnm1), mRNA.	NM_080689.3	62719322			✓
0.0014738	1.27264	down	Hspa4l	294993	heat shock 70kDa protein 4-like (predicted) (Hspa4l_predicted), mRNA.	XM_215549.4	109464711			✓
0.00609969	1.27528	down	LOC304462	304462	DNA segment, Chr 5, Brigham & Womens Genetics 0834 expressed (predicted) (LOC304462), mRNA.	XM_222140.3	62658833			✓
0.00918348	1.30303	down	Nptx2	288475	neuronal pentraxin II (predicted) (Nptx2_predicted), mRNA.	XM_221901.3	62658442			✓
0.000331062	1.32095	down	Isl2	57233	insulin related protein 2 (islet 2) (Isl2), mRNA.	NM_020471.1	9994170			✓
0.00747854	1.33858	down	Vmd2l3	314847	vitelliform macular dystrophy 2-like 3 (predicted) (Vmd2l3_predicted), mRNA.	XM_001080943.1	109481980			✓
0.0105193	1.35375	down	Pde4b	24626	phosphodiesterase 4B, cAMP specific (Pde4b), mRNA.	NM_017031.2	19923679			✓
0.0151026	1.37379	down	RGD1563167	499156	growth arrest-specific protein 2 - mouse (predicted) (RGD1563167_predicted), mRNA.	XM_001080336.1	109462017			✓
6.27843e-05	1.42713	down	Plp1	24943	proteolipid protein 1 (Plp1), mRNA.	NM_030990.1	13591879			✓
0.000140081	1.43053	down	Drd4	25432	dopamine receptor D4 (Drd4), mRNA.	NM_012944.1	6978778			✓
0.0439873	1.44716	down	Apeg3	619476	antisense paternally expressed gene 3 (Apeg3), mRNA.	NM_001034160.1	77682196			✓
0.0343769	1.48042	down	Aox1	54349	aldehyde oxidase 1 (Aox1), mRNA.	NM_019363.2	32996706			✓
0.00346491	1.50152	down	Nefh	24587	neurofilament, heavy polypeptide (Nefh), mRNA.	NM_012607.1	29789025			✓
0.0431985	1.56161	down	Dusp8	361679	dual specificity phosphatase 8 (predicted) (Dusp8_predicted), mRNA.	XM_001063880.1	109463221			✓
0.0196278	1.61119	down	Omg	450224	oligodendrocyte-myelin glycoprotein (Omg), mRNA.	NM_001005898.2	56799438			✓
0.000604228	1.67229	down	Siah2	140593	seven in absentia 2 (Siah2), mRNA.	NM_134457.1	19745173			✓
0.0462987	1.20358	up	RGD1310430	362905	RIKEN cDNA 4921531G14 (predicted) (RGD1310430_predicted), mRNA.	XM_343234.3	109480693			✓
0.0231973	1.20679	up	Echdc1	361465	enoyl Coenzyme A hydratase domain containing 1 (Echdc1), mRNA.	NM_001007734.1	56090597			✓
0.0318639	1.21634	up	Rhoq	85428	ras homolog gene family, member Q (Rhoq), mRNA.	NM_053522.1	16758285			✓
0.0445361	1.25069	up	Dclk2	310698	doublecortin-like kinase 2 (Dclk2), mRNA.	NM_001009691.2	57863767			✓
0.00231613	1.27824	up	Ctsl1	25697	cathepsin L1 (Ctsl1), mRNA.	NM_013156.1	6978722			✓
0.00135222	1.27838	up	RGD1561492	499755	hypothetical protein MGC14141 (predicted) (RGD1561492_predicted), mRNA.	XM_001074131.1	109469440			✓
0.0161136	1.28241	up	Nfkb2	309452	nuclear factor of kappa light polypeptide gene enhancer in B-cells 2, p49/p100 (Nfkb2), mRNA.	NM_001008349.1	56605773			✓
0.00168118	1.30317	up	Crb3	301112	crumbs homolog 3 (Drosophila) (Crb3), mRNA.	NM_001025661.1	71043837			✓
0.0269701	1.31939	up	Plxnd1	312652	plexin D1 (predicted) (Plxnd1_predicted), mRNA.	XM_232283.4	109472513			✓
0.00584754	1.33643	up	Nuak2	289419	NUAK family, SNF1-like kinase, 2 (Nuak2), mRNA.	NM_001007617.1	56090653			✓
0.0057899	1.37383	up	Btg2	29619	B-cell translocation gene 2, anti-proliferative (Btg2), mRNA.	NM_017259.1	8393001			✓
0.0368792	1.37747	up	Lama5	140433	laminin, alpha 5 (Lama5), mRNA.	XM_001060527.1	109471511			✓
0.00769948	1.40558	up	Arpc3	288669	actin related protein 2/3 complex, subunit 3 (predicted) (Arpc3_predicted), mRNA.	XM_213782.4	109495910			✓
0.00970286	1.51519	up	Cd48	245962	Cd48 molecule (Cd48), mRNA.	NM_139103.1	20806146			✓
0.000146957	1.52263	up	Ell3	296102	elongation factor RNA polymerase II-like 3 (Ell3), mRNA.	NM_001011957.1	58865483			✓
0.00120311	1.59888	up	Psmb9	24967	proteasome (prosome, macropain) subunit, beta type 9 (large multifunctional peptidase 2) (Psmb9), mRNA.	NM_012708.1	6981425			✓
1.02966e-05	1.59922	up	Gpsm3	406163	G-protein signalling modulator 3 (AGS3-like, C. elegans) (Gpsm3), mRNA.	NM_001003974.2	56961638			✓
0.0253681	1.79833	up	Umps	288051	uridine monophosphate synthetase (Umps), mRNA.	NM_001025402.1	70794779			✓
0.000688465	1.82872	up	Psme1	29630	proteasome (prosome, macropain) 28 subunit, alpha (Psme1), mRNA.	NM_017264.2	61098213			✓
0.021499	2.10709	up	Mlf1	310483	myeloid leukemia factor 1 (predicted) (Mlf1_predicted), mRNA.	XM_001065492.1	109466772			✓
1.92321e-05	2.65238	up	Rnase4	56759	ribonuclease, RNase A family 4 (Rnase4), mRNA.	NM_020082.2	47575856			✓
0.0278361	1.20133	down	LOC499178	499178	LOC499178 (LOC499178), mRNA.	XM_579926.1	62640711			✔
0.0157289	1.20714	down	Kirrel2	292784	kin of IRRE like 2 (Drosophila) (predicted) (Kirrel2_predicted), mRNA.	XM_218486.3	62639341			✔
0.00763194	1.20778	down	Zmynd12	313552	zinc finger, MYND domain containing 12 (predicted) (Zmynd12_predicted), mRNA.	XM_001073920.1	109477126			✔
0.0117865	1.21207	down	Bcl11b	314423	B-cell leukemia/lymphoma 11B (predicted) (Bcl11b_predicted), mRNA.	XM_001069879.1	109479931			✔
0.019788	1.22151	down	RGD1306591	362959	Protein C22orf5 (RGD1306591), mRNA.	XM_001076493.1	109482562			✔
0.0179653	1.22172	down	Dedd	83631	death effector domain-containing (Dedd), mRNA.	NM_031800.1	13929133			✔
0.00472958	1.22194	down	Scn4b	315611	sodium channel, type IV, beta (Scn4b), mRNA.	NM_001008880.1	57114337			✔
0.0273686	1.22231	down	Mybl1	297783	myeloblastosis oncogene-like 1 (predicted) (Mybl1_predicted), mRNA.	XM_232620.3	62648548			✔
0.000948144	1.22653	down	LOC368001	368001	B-cell CLL/lymphoma 7B isoform 1 (LOC368001), mRNA.	XM_001077499.1	109497203			✔
0.000766562	1.22804	down	Hs3st2	293451	heparan sulfate (glucosamine) 3-O-sulfotransferase 2 (Hs3st2), mRNA.	NM_181370.2	31343432			✔
0.00964702	1.2372	down	Pou4f2	171355	POU domain, class 4, transcription factor 2 (Pou4f2), mRNA.	XM_001074669.1	109508736			✔
0.00226062	1.24137	down	RGD1310536	365176	TTF-I interacting peptide 20; TIP20; Transcription Termination Factor I Interacting Peptide 20 (predicted) (RGD1310536_predicted), mRNA.	XM_001069506.1	109461099			✔
0.0380773	1.25253	down	Thy1	24832	Thy-1 cell surface antigen (Thy1), mRNA.	NM_012673.1	6981653			✔
0.0362164	1.25529	down	LOC497806	497806	hypothetical gene supported by NM_173309 (LOC497806), mRNA.	XM_579702.1	62649217			✔
0.0115516	1.26026	down	Gdf1	306351	growth differentiation factor 1 (predicted) (Gdf1_predicted), mRNA.	XM_001071020.1	109504001			✔
0.0391265	1.27286	down	Tob2	315159	transducer of ERBB2, 2 (Tob2), mRNA.	NM_001007146.1	55741834			✔
0.019941	1.29105	down	Fbxo11	301674	F-box protein 11 (Fbxo11), mRNA.	NM_181631.2	31795572			✔
0.0265654	1.37515	down	Camk2n1	287005	calcium/calmodulin-dependent protein kinase II inhibitor 1 (Camk2n1), mRNA.	NM_173337.1	27545439			✔
0.0326974	1.47003	down	LOC497675	497675	hypothetical gene supported by NM_153735 (LOC497675), mRNA.	XM_579686.1	62657452			✔
0.0122774	1.20059	up	Cpz	83575	carboxypeptidase Z (Cpz), mRNA.	NM_031766.1	13929065			✔
0.0470715	1.20414	up	Ppil3	301432	peptidylprolyl isomerase (cyclophilin)-like 3 (Ppil3), mRNA.	NM_175707.3	56799427			✔
0.03574	1.20449	up	RGD1308523	289502	RIKEN cDNA 4932413O14 gene (predicted) (RGD1308523_predicted), mRNA.	XM_223231.4	109499528			✔
0.0189918	1.20477	up	RGD1565640	503227	IQ motif containing F1 (predicted) (RGD1565640_predicted), mRNA.	XM_578754.2	109483926			✔
0.0192103	1.21429	up	Efs	290212	embryonal Fyn-associated substrate (predicted) (Efs_predicted), mRNA.	XM_237944.4	109501608			✔
0.0178877	1.21581	up	Prdm7	365155	PR domain containing 7 (predicted) (Prdm7_predicted), mRNA.	XM_344847.2	62638680			✔
0.0254174	1.22592	up	LOC500392	500392	hypothetical protein FLJ25692 (LOC500392), mRNA.	NM_001024340.1	66730468			✔
0.023509	1.22876	up	Rg9mtd3	298081	RNA (guanine-9-) methyltransferase domain containing 3 (Rg9mtd3), mRNA.	NM_001013090.1	61556923			✔
0.00825684	1.24415	up	Itga7	81008	integrin alpha 7 (Itga7), mRNA.	NM_030842.1	57528940			✔
0.00916565	1.24839	up	LOC683694	683694	glyoxylate reductase/hydroxypyruvate reductase (LOC683694), mRNA.	XM_001065009.1	109476347			✔
0.0232976	1.25981	up	Gins4	290842	GINS complex subunit 4 (Sld5 homolog) (Gins4), mRNA.	NM_001030027.1	71795642			✔
0.0490519	1.26919	up	LOC300043	300043	poly (ADP-ribose) polymerase family, member 10 (LOC300043), mRNA.	XM_216963.3	62652637			✔
0.0348454	1.27302	up	LOC498327	498327	ATP-binding cassette, subfamily G, member 3 (LOC498327), mRNA.	XM_573551.1	62660109			✔
0.0117736	1.29962	up	Cyp2j3	313375	cytochrome P450, family 2, subfamily j, polypeptide 3 (Cyp2j3), mRNA.	NM_175766.2	31343521			✔
0.000179339	1.30018	up	Rarb	24706	retinoic acid receptor, beta, transcript variant 2 (Rarb), mRNA.	XM_001059523.1	109502148			✔
0.020478	1.30222	up	Abhd1	313917	abhydrolase domain containing 1 (Abhd1), mRNA.	NM_001008520.1	56606089			✔
0.0253027	1.31308	up	RGD1560915	500065	Hypothetical protein MGC30714 (predicted) (RGD1560915_predicted), mRNA.	XM_575419.2	109471813			✔
0.0210857	1.34071	up	RGD1310093	303538	hypothetical protein FLJ11354 (predicted) (RGD1310093_predicted), mRNA.	XM_220978.4	109489022			✔
0.021469	1.34524	up	LOC497706	497706	hypothetical gene supported by NM_031819 (LOC497706), mRNA.	XM_579538.1	62662634			✔
0.0408511	1.35427	up	Sec16b	89868	SEC16 homolog B (S. cerevisiae) (Sec16b), mRNA.	NM_053571.1	16758343			✔
0.00858603	1.36603	up	Dap	64322	death-associated protein (Dap), mRNA.	NM_022526.1	11968109			✔
0.035146	1.38022	up	Enpp1	85496	ectonucleotide pyrophosphatase/phosphodiesterase 1 (Enpp1), mRNA.	NM_053535.1	16758299			✔
0.012838	1.41265	up	RGD1310224	291076	RIKEN cDNA 1810022C23 (RGD1310224), mRNA.	NM_001009275.1	57164136			✔
0.015339	1.43353	up	Pthr1	56813	parathyroid hormone receptor 1 (Pthr1), mRNA.	NM_020073.1	9910335			✔
0.0457394	1.60696	up	Plxdc2	361282	plexin domain containing 2 (predicted) (Plxdc2_predicted), mRNA.	XM_001073244.1	109506203			✔
0.049614	1.87171	up	Atp1a2	24212	ATPase, Na+/K+ transporting, alpha 2 polypeptide (Atp1a2), mRNA.	NM_012505.1	6978544			✔
0.0133109	3.64475	up	RGD1309610	362136	LOC362136 (predicted) (RGD1309610_predicted), mRNA.	XM_001068559.1	109469939			✔
0.0411251	1.20271	down	Dhx15	289693	DEAH (Asp-Glu-Ala-His) box polypeptide 15 (predicted) (Dhx15_predicted), mRNA.	XM_001054651.1	109500662	✔	✓
0.0160464	1.20307	down	Eif4b	300253	eukaryotic translation initiation factor 4B (Eif4b), mRNA.	NM_001008324.1	56605725	✔	✓
0.00857163	1.20607	down	Gng7	58979	guanine nucleotide binding protein (G protein), gamma 7 (Gng7), mRNA.	NM_024138.1	13162315	✔	✓
0.0436323	1.20878	down	Ebf3	361668	early B-cell factor 3 (predicted) (Ebf3_predicted), mRNA.	XM_001056705.1	109463080	✔	✓
0.037314	1.21997	down	RGD1307526	315792	modulator of estrogen induced transcription, transcript variant 1 (RGD1307526), misc RNA.	XR_009637.1	109484950	✔	✓
0.049479	1.22128	down	RGD1307235	309053	RIKEN cDNA 2310035C23 (predicted) (RGD1307235_predicted), mRNA.	XM_219401.4	109497727	✔	✓
0.0170803	1.22268	down	RGD1311907	315216	hypothetical LOC315216 (predicted) (RGD1311907_predicted), mRNA.	XM_235559.4	109481124	✔	✓
0.0238208	1.22474	down	LOC498987	498987	KIAA1913 (LOC498987), mRNA.	XM_574278.1	62638357	✔	✓
0.0186079	1.23179	down	Grm2	24415	glutamate receptor, metabotropic 2 (Grm2), mRNA.	XM_343470.2	109483934	✔	✓
0.0019886	1.23625	down	Noc2l	313777	nucleolar complex associated 2 homolog (S. cerevisiae) (Noc2l), mRNA.	NM_001033897.1	76559928	✔	✓
0.00943851	1.25315	down	Ndrg4	64457	N-myc downstream regulated gene 4 (Ndrg4), mRNA.	NM_031967.1	14010840	✔	✓
0.00522747	1.26322	down	Larp1	303158	La ribonucleoprotein domain family, member 1 (predicted) (Larp1_predicted), mRNA.	XM_220446.4	109488126	✔	✓
0.000861616	1.26993	down	Rlbp1	293049	retinaldehyde binding protein 1 (predicted) (Rlbp1_predicted), mRNA.	XM_214973.4	109458940	✔	✓
0.00853412	1.27126	down	Yy1	24919	YY1 transcription factor (Yy1), mRNA.	NM_173290.1	27545349	✔	✓
0.00382425	1.27904	down	LOC499612	499612	NADH dehydrogenase (ubiquinone) 1, subcomplex unknown, 1 (LOC499612), mRNA.	XM_574939.1	62643428	✔	✓
0.0152021	1.28172	down	Aytl2	361467	acyltransferase like 2 (predicted) (Aytl2_predicted), mRNA.	XM_341747.3	109457651	✔	✓
0.00735986	1.28265	down	Slc4a7	117955	solute carrier family 4, sodium bicarbonate cotransporter, member 7 (Slc4a7), mRNA.	NM_058211.1	17158028	✔	✓
0.0432395	1.28343	down			RVL15748 Wackym-Soares normalized rat vestibular cDNA library cDNA 5', mRNA	DV723824	82517147	✔	✓
0.00628509	1.28487	down	Slc17a6	84487	solute carrier family 17 (sodium-dependent inorganic phosphate cotransporter), member 6 (Slc17a6), mRNA.	NM_053427.1	16758165	✔	✓
0.0111188	1.28821	down	Add1	24170	adducin 1 (alpha) (Add1), mRNA.	NM_016990.2	78365243	✔	✓
0.00466711	1.29292	down	Gnal	24611	guanine nucleotide binding protein, alpha stimulating, olfactory type (Gnal), mRNA.	XM_341626.3	109506679	✔	✓
0.00292655	1.29638	down	Crx	60446	cone-rod homeobox (Crx), mRNA.	NM_021855.1	11177895	✔	✓
0.0317116	1.32897	down	Gsk3a	50686	glycogen synthase kinase 3 alpha (Gsk3a), mRNA.	NM_017344.1	8393495	✔	✓
0.00963586	1.34924	down	Cpne4	367160	copine IV (predicted), transcript variant 3 (Cpne4_predicted), mRNA.	XM_001070003.1	109485207	✔	✓
0.00490401	1.35973	down	Cd93	84398	CD93 molecule (Cd93), mRNA.	NM_053383.1	16758113	✔	✓
0.0412757	1.37593	down	Pclo	56768	piccolo (presynaptic cytomatrix protein) (Pclo), transcript variant 1, mRNA.	NM_020098.1	10048482	✔	✓
0.00535649	1.39928	down	Nefl	83613	neurofilament, light polypeptide (Nefl), mRNA.	NM_031783.1	13929097	✔	✓
0.0474191	1.49189	down	LOC497725	497725	hypothetical gene supported by NM_031809 (LOC497725), mRNA.	XM_579536.1	62664762	✔	✓
0.0331395	1.53645	down	LOC687796	687796	hypothetical protein LOC687795, transcript variant 2 (LOC687796), mRNA.	XM_001078497.1	109462905	✔	✓
0.0455379	1.20704	up	Nipsnap3a	313211	nipsnap homolog 3A (C. elegans) (Nipsnap3a), mRNA.	NM_001009422.1	57164106	✔	✓
0.0226388	1.20736	up	RGD1563250	300441	RGD1563250 (predicted) (RGD1563250_predicted), mRNA.	XM_001077527.1	109484375	✔	✓
0.014456	1.21538	up	Tspan6	302313	tetraspanin 6 (Tspan6), mRNA.	XM_001067945.1	109512318	✔	✓
0.0499143	1.23869	up	Spag4	83623	sperm associated antigen 4 (Spag4), mRNA.	NM_031792.1	13929121	✔	✓
0.0291089	1.2515	up	Inpp5d	54259	inositol polyphosphate-5-phosphatase D (Inpp5d), mRNA.	NM_019311.1	9506812	✔	✓
0.0190468	1.26019	up	Myd88	301059	myeloid differentiation primary response gene 88 (Myd88), mRNA.	NM_198130.1	37693502	✔	✓
0.00142903	1.26202	up	Hsd11b1	25116	hydroxysteroid 11-beta dehydrogenase 1 (Hsd11b1), mRNA.	NM_017080.2	78214364	✔	✓
0.00667259	1.26239	up	Leprot	56766	leptin receptor overlapping transcript (Leprot), mRNA.	NM_020099.2	40538854	✔	✓
0.00699647	1.27226	up	Ormdl2	288783	ORM1-like 2 (S. cerevisiae) (predicted) (Ormdl2_predicted), mRNA.	XM_213832.4	109480146	✔	✓
0.014137	1.29196	up	Cd81	25621	Cd81 molecule (Cd81), mRNA.	NM_013087.1	6978638	✔	✓
0.0114682	1.29311	up	LOC360800	360800	Sulfatase modifying factor 2 precursor (C-alpha-formyglycine-generating enzyme 2) (LOC360800), mRNA.	XM_341070.2	62658800	✔	✓
0.0474451	1.29484	up	Hn1	287828	hematological and neurological expressed 1 (Hn1), mRNA.	NM_001005876.1	54312083	✔	✓
0.00960281	1.30353	up	RGD1310133	292760	RIKEN cDNA 5830482F20 gene (predicted) (RGD1310133_predicted), mRNA.	XM_001078499.1	109461595	✔	✓
0.00550888	1.30898	up	Gstk1	297029	glutathione S-transferase kappa 1 (Gstk1), mRNA.	NM_181371.2	31442873	✔	✓
0.0132607	1.3096	up	Tyrobp	361537	Tyro protein tyrosine kinase binding protein (Tyrobp), mRNA.	NM_212525.1	47058975	✔	✓
0.000687456	1.31353	up	Taf13	310784	TAF13 RNA polymerase II, TATA box binding protein (TBP)-associated factor (predicted) (Taf13_predicted), mRNA.	XM_227586.3	109465384	✔	✓
0.00163666	1.31415	up	Gypc	364837	glycophorin C (Gerbich blood group) (Gypc), mRNA.	NM_001013233.1	61557378	✔	✓
0.0138629	1.3197	up	Tmem37	245953	transmembrane protein 37 (Tmem37), mRNA.	NM_139095.1	21687107	✔	✓
0.00543838	1.3248	up	Rab3d	140665	RAB3D, member RAS oncogene family (Rab3d), mRNA.	NM_080580.2	54262181	✔	✓
0.00475455	1.32614	up	RGD1309051	299153	chromosome 14 open reading frame 50 (RGD1309051), mRNA.	NM_001013944.1	62078616	✔	✓
0.00417362	1.33546	up	Npc2	286898	Niemann-Pick disease, type C2 (Npc2), mRNA.	NM_173118.1	27465564	✔	✓
0.00157876	1.33703	up	RGD1305326	295462	hypothetical protein FLJ20647 (predicted) (RGD1305326_predicted), mRNA.	XM_001076863.1	109467635	✔	✓
0.0356396	1.34572	up	Aadat	29416	aminoadipate aminotransferase (Aadat), mRNA.	NM_017193.1	8393640	✔	✓
0.00408195	1.3544	up	H2-M3	24747	histocompatibility 2, M region locus 3 (H2-M3), mRNA.	NM_022921.1	12621071	✔	✓
0.00416579	1.362	up	Lamb2	25473	laminin, beta 2 (Lamb2), mRNA.	NM_012974.1	6981141	✔	✓
0.000573162	1.39681	up	Rab13	81756	RAB13, member RAS oncogene family (Rab13), mRNA.	NM_031092.1	29789270	✔	✓
0.0206711	1.4061	up	Gldc	309312	glycine decarboxylase (predicted) (Gldc_predicted), mRNA.	XM_219785.4	109459999	✔	✓
0.00961297	1.40831	up	RGD1563988	500606	protein containing single MORN motif in testis (predicted) (RGD1563988_predicted), mRNA.	XM_001062730.1	109478934	✔	✓
0.00141714	1.41681	up	Entpd2	64467	ectonucleoside triphosphate diphosphohydrolase 2 (Entpd2), mRNA.	NM_172030.1	25282444	✔	✓
0.00713593	1.41829	up	Blvrb	292737	biliverdin reductase B (flavin reductase (NADPH)) (predicted) (Blvrb_predicted), mRNA.	XM_001072142.1	109461492	✔	✓
0.0113984	1.42041	up	Fuca	24375	fucosidase, alpha-L- 1, tissue (Fuca), mRNA.	NM_012562.1	6978860	✔	✓
0.0031941	1.43623	up	Mdk	81517	midkine (Mdk), mRNA.	NM_030859.1	13540680	✔	✓
0.0295243	1.45129	up	Lrrk1	308703	leucine-rich repeat kinase 1 (predicted) (Lrrk1_predicted), mRNA.	XM_218760.4	109458877	✔	✓
0.00128943	1.45506	up	Ifi35	287719	interferon-induced protein 35 (Ifi35), mRNA.	NM_001009625.1	57526853	✔	✓
0.00109397	1.48439	up	Ly86	291359	lymphocyte antigen 86 (predicted) (Ly86_predicted), mRNA.	XM_225636.4	109504839	✔	✓
0.0205249	1.49651	up	RGD1560373	304091	class II cytokine receptor 4 (predicted) (RGD1560373_predicted), mRNA.	XM_221655.4	109492928	✔	✓
0.0340804	1.50585	up	Slc24a6	498185	solute carrier family 24 (sodium/potassium/calcium exchanger), member 6 (Slc24a6), mRNA.	NM_001017488.1	62945329	✔	✓
0.00106698	1.50749	up	Rhoc	295342	ras homolog gene family, member C (predicted) (Rhoc_predicted), mRNA.	XM_215659.4	109465387	✔	✓
0.00929083	1.55502	up	Ccr5	117029	chemokine (C-C motif) receptor 5 (Ccr5), mRNA.	NM_053960.3	82617607	✔	✓
0.0322383	1.72244	up	Lgals3bp	245955	lectin, galactoside-binding, soluble, 3 binding protein (Lgals3bp), mRNA.	NM_139096.1	20806134	✔	✓
0.0397582	1.78113	up	Emp3	81505	epithelial membrane protein 3 (Emp3), mRNA.	NM_030847.1	13540655	✔	✓
0.00460493	1.81013	up	Tmem140	362334	transmembrane protein 140 (Tmem140), mRNA.	NM_001009709.1	57527559	✔	✓
0.0177739	1.8552	up	Cidea	291541	cell death-inducing DNA fragmentation factor, alpha subunit-like effector A (predicted) (Cidea_predicted), mRNA.	XM_214551.4	109506730	✔	✓
4.94339e-05	1.92418	up	LOC498279	498279	High affinity immunoglobulin epsilon receptor gamma-subunit precursor (FceRI gamma) (IgE Fc receptor gamma-subunit) (Fc-epsilon RI-gamma) (LOC498279), mRNA.	XM_001053627.1	109499022	✔	✓
0.0285707	2.06168	up	Adamts1	79252	a disintegrin-like and metallopeptidse (reprolysin type) with thrombospondin type 1 motif, 1 (Adamts1), mRNA.	NM_024400.1	13242315	✔	✓
0.00348871	2.0826	up	Cd1d1	25109	CD1d1 molecule (Cd1d1), mRNA.	NM_017079.1	8393069	✔	✓
0.0110241	1.20212	down	Tmem16d	299714	transmembrane protein 16D (eight membrane-spanning domains) (predicted) (Tmem16d_predicted), mRNA.	XM_235024.3	62651998		✓
0.00728326	1.20574	down	RGD1562841	363563	fibrillarin (predicted) (RGD1562841_predicted), mRNA.	XM_001065126.1	109490496		✓
0.0062223	1.20629	down	Rxrb	361801	retinoid X receptor beta (Rxrb), mRNA.	NM_206849.2	77404366		✓
0.0008478	1.20948	down	RGD1565149	307923	chromosome 16 open reading frame 7 (predicted) (RGD1565149_predicted), mRNA.	XM_001077968.1	109508943		✓
0.0498438	1.21459	down	RGD1307493	303317	membrane protein expressed in epithelial-like lung adenocarcinoma (predicted) (RGD1307493_predicted), mRNA.	XM_001080742.1	109491331		✓
0.0123727	1.21621	down	LOC502011	502011	IL-17D (LOC502011), mRNA.	XM_577439.1	62661954		✓
0.010502	1.21849	down	LOC681153	681153	hypothetical protein LOC681153 (LOC681153), mRNA.	XM_001060542.1	109499478		✓
0.00332904	1.2237	down	LOC362012	362012	family with sequence similarity 40, member A (LOC362012), mRNA.	XM_342311.3	109465350		✓
0.0317992	1.23353	down	Scg2	24765	secretogranin II (chromogranin C) (Scg2), mRNA.	NM_022669.1	12083600		✓
0.0116904	1.24766	down	Dscam	171119	Down syndrome cell adhesion molecule (Dscam), mRNA.	NM_133587.1	19424285		✓
0.0224005	1.24856	down	Plekha5	246237	pleckstrin homology domain containing, family A member 5 (Plekha5), mRNA.	XM_001073627.1	109474440		✓
0.00538884	1.28691	down	Zc3h18	292067	zinc finger CCCH-type containing 18 (Zc3h18), mRNA.	NM_201416.1	41386746		✓
0.0127071	1.29001	down	Rtbnd	304667	retbindin (predicted) (Rtbnd_predicted), mRNA.	XM_001071055.1	109508607		✓
0.0326047	1.30437	down	Kcnk3	29553	potassium channel, subfamily K, member 3 (Kcnk3), mRNA.	NM_033376.1	15431282		✓
0.0380388	1.30719	down	Btg4	315650	B-cell translocation gene 4 (Btg4), mRNA.	NM_001013176.1	61557189		✓
0.0134318	1.33572	down	Sts	24800	steroid sulfatase (Sts), mRNA.	NM_012661.1	6981597		✓
0.0370593	1.34946	down	LOC499701	499701	LOC499701 (LOC499701), mRNA.	XM_580006.1	62644271		✓
0.00237351	1.34953	down	Dpysl5	65208	dihydropyrimidinase-like 5 (Dpysl5), mRNA.	NM_023023.1	12711691		✓
0.035277	1.37348	down	Ciita	85483	class II transactivator (Ciita), mRNA.	NM_053529.1	16758941		✓
0.000158886	1.40549	down	LOC290396	290396	Protein diaphanous homolog 3 (Diaphanous-related formin-3) (DRF3) (mDIA2) (p134mDIA2) (LOC290396), mRNA.	XM_001074393.1	109502796		✓
0.0132161	1.42016	down	Tac2	29191	tachykinin 2 (Tac2), mRNA.	NM_019162.1	9507174		✓
0.0346224	1.42192	down	Cabp4	365394	calcium binding protein 4 (predicted) (Cabp4_predicted), mRNA.	XM_001068353.1	109463330		✓
0.0116836	1.48004	down	Slc38a2	29642	solute carrier family 38, member 2 (Slc38a2), mRNA.	NM_181090.2	31343536		✓
0.000404909	1.53775	down	RGD1564708	307253	RIKEN cDNA 3110023G01 (predicted) (RGD1564708_predicted), mRNA.	XM_225707.4	109506801		✓
0.0235483	1.6066	down	Slc6a6	29464	solute carrier family 6 (neurotransmitter transporter, taurine), member 6 (Slc6a6), mRNA.	NM_017206.1	8394317		✓
0.0156994	2.30366	down	Eprs	289352	glutamyl-prolyl-tRNA synthetase (Eprs), mRNA.	NM_001024238.1	66793365		✓
0.0122776	1.2075	up	Slc44a2	363024	solute carrier family 44, member 2 (predicted) (Slc44a2_predicted), mRNA.	XM_001077428.1	109484365		✓
0.0465552	1.22278	up	Zc3h15	362154	zinc finger CCCH-type containing 15 (Zc3h15), mRNA.	NM_001010963.1	58219527		✓
0.0143252	1.22466	up	Gusb	24434	glucuronidase, beta (Gusb), mRNA.	NM_017015.1	8393509		✓
0.0148823	1.24309	up	Nme6	58964	expressed in non-metastatic cells 6, protein (nucleoside diphosphate kinase) (Nme6), mRNA.	XM_343488.3	109483979		✓
0.00499427	1.24566	up	Cyp26b1	312495	cytochrome P450, family 26, subfamily b, polypeptide 1 (Cyp26b1), mRNA.	NM_181087.2	31342016		✓
0.0413293	1.25086	up	RGD1565350	362513	Shb protein (predicted) (RGD1565350_predicted), mRNA.	XR_008772.1	109476431		✓
0.00770006	1.26336	up	Ucp2	54315	uncoupling protein 2 (mitochondrial, proton carrier) (Ucp2), mRNA.	NM_019354.1	9507230		✓
0.00246123	1.27943	up	Ap1g2	290215	adaptor protein complex AP-1, gamma 2 subunit (predicted) (Ap1g2_predicted), mRNA.	XM_214197.3	62661473		✓
0.0124882	1.28829	up	Acaa2	170465	acetyl-Coenzyme A acyltransferase 2 (Acaa2), nuclear gene encoding mitochondrial protein, mRNA.	NM_130433.1	18426865		✓
0.0448515	1.30151	up	Ptpru	116680	protein tyrosine phosphatase, receptor type, U (Ptpru), mRNA.	XM_342930.2	62649754		✓
0.00542044	1.31162	up	Klhdc8b	306589	kelch domain containing 8B (Klhdc8b), mRNA.	NM_001007685.1	56090354		✓
0.0176506	1.32269	up	Manba	310864	mannosidase, beta A, lysosomal (Manba), mRNA.	NM_001031655.1	72255542		✓
0.012472	1.33383	up	Ctnnal1	298019	catenin (cadherin associated protein), alpha-like 1 (predicted) (Ctnnal1_predicted), mRNA.	XM_001059679.1	109476536		✓
5.18143e-05	1.3899	up	Adamtsl4	310670	ADAMTS-like 4 (Adamtsl4), mRNA.	NM_001034012.1	77404406		✓
0.0141762	1.43528	up	Rab26	171111	RAB26, member RAS oncogene family (Rab26), mRNA.	NM_133580.1	19424271		✓
0.000121456	1.43677	up	Adamtsl4	310670	ADAMTS-like 4 (Adamtsl4), mRNA.	NM_001034012.1	77404406		✓
0.00361126	1.44386	up	Cmtm8	301045	CKLF-like MARVEL transmembrane domain containing 8 (Cmtm8), mRNA.	NM_198754.2	56961654		✓
0.0218014	1.45294	up	Lmcd1	494021	LIM and cysteine-rich domains 1 (predicted) (Lmcd1_predicted), mRNA.	XM_001076072.1	109473961		✓
0.0489315	1.47847	up	Bag3	293524	Bcl2-associated athanogene 3 (Bag3), mRNA.	NM_001011936.1	58865449		✓
0.00592645	1.74681	up	Tapbp	25217	TAP binding protein (Tapbp), mRNA.	NM_033098.1	16975493		✓
0.00122681	2.0963	up	Impa2	282636	inositol (myo)-1(or 4)-monophosphatase 2 (Impa2), mRNA.	NM_172224.1	26449165		✓
0.0257806	2.1562	up	Rabggta	58983	Rab geranylgeranyl transferase, a subunit (Rabggta), mRNA.	NM_031654.1	13928905		✓
0.0269146	1.20419	down	Cygb	170520	cytoglobin (Cygb), mRNA.	NM_130744.2	56961647	✓	✔
0.0377931	1.22307	down	RGD1309585	360531	hypothetical protein FLJ11526 (predicted) (RGD1309585_predicted), mRNA.	XM_340803.3	109488124	✓	✔
0.0355411	1.2485	down	Pcdh8	64865	protocadherin 8 (Pcdh8), mRNA.	NM_022868.1	12408331	✓	✔
0.0127712	1.24976	down	Mnt	287521	max binding protein (predicted) (Mnt_predicted), mRNA.	XM_220698.4	109488521	✓	✔
0.0108504	1.2596	down	RGD1306873	304285	RIKEN cDNA 2210010N04 gene (RGD1306873), mRNA.	NM_001037191.1	81295338	✓	✔
0.0107484	1.26868	down	Myd116	171071	myeloid differentiation primary response gene 116 (Myd116), mRNA.	NM_133546.1	19424213	✓	✔
0.0015827	1.3033	down	LOC498145	498145	RIKEN cDNA 2810453I06 (LOC498145), mRNA.	NM_001017485.1	62945325	✓	✔
0.00455603	1.39282	down	RGD1305719	289727	putative N-acetyltransferase Camello 2 (predicted) (RGD1305719_predicted), mRNA.	XM_001060523.1	109500777	✓	✔
0.0198968	1.39634	down	LOC499898	499898	LOC499898 (LOC499898), mRNA.	XM_575244.1	62645942	✓	✔
0.0010115	1.43056	down	RGD1306212	360839	hypothetical protein DKFZp566N034 (predicted) (RGD1306212_predicted), mRNA.	XM_001057323.1	109498575	✓	✔
0.0163668	1.79661	down	Tnrc6	308971	trinucleotide repeat containing 6 (predicted) (Tnrc6_predicted), mRNA.	XM_001079613.1	109462828	✓	✔
0.0354784	1.22971	up	Pigl	192263	phosphatidylinositol glycan, class L (Pigl), mRNA.	NM_138901.1	20302096	✓	✔
0.0244519	1.23313	up	Bambi	83837	BMP and activin membrane-bound inhibitor, homolog (Xenopus laevis) (Bambi), mRNA.	NM_139082.2	47271542	✓	✔
0.0497015	1.24027	up	LOC501098	501098	ubiquitin specific protease 49 (predicted) (LOC501098), mRNA.	XM_576513.2	109485755	✓	✔
0.0258885	1.25754	up	Hps1	114638	Hermansky-Pudlak syndrome 1 homolog (human) (Hps1), mRNA.	NM_040669.1	16163667	✓	✔
0.0424457	1.26174	up	RGD1306811	300517	hypothetical protein FLJ25530 (predicted) (RGD1306811_predicted), mRNA.	XR_007886.1	109484510	✓	✔
0.00976008	1.30898	up	Cenpj	305909	centromere protein J (predicted) (Cenpj_predicted), mRNA.	XM_001062282.1	109502496	✓	✔
0.000788544	1.3509	up	Stox1	294388	storkhead box 1 (predicted) (Stox1_predicted), mRNA.	XM_001057100.1	109510122	✓	✔
0.042154	1.3592	up	LOC498674	498674	LOC498674 (LOC498674), mRNA.	XM_579847.1	62663052	✓	✔
0.00877444	1.37674	up	Kdelr3	315131	KDEL (Lys-Asp-Glu-Leu) endoplasmic reticulum protein retention receptor 3 (predicted) (Kdelr3_predicted), mRNA.	XM_001076531.1	109482564	✓	✔
0.0057721	1.39898	up	Tmem19	299800	transmembrane protein 19 (Tmem19), mRNA.	NM_199098.1	40018571	✓	✔
0.00419171	1.40254	up	Ezr	54319	ezrin (Ezr), mRNA.	NM_019357.1	52138520	✓	✔
0.030967	1.21441	down	Guca1b	316218	guanylate cyclase activator 1B (predicted) (Guca1b_predicted), mRNA.	XM_236951.4	109485762	✔	✔
0.0106934	1.21762	down	Slc45a1	246258	solute carrier family 45, member 1 (Slc45a1), mRNA.	NM_144747.2	62990186	✔	✔
0.0316869	1.22767	down	Kpnb1	24917	karyopherin (importin) beta 1 (Kpnb1), mRNA.	XM_001081365.1	109491766	✔	✔
0.0135377	1.25749	down	Irx2	306657	Iroquois related homeobox 2 (Drosophila) (Irx2), mRNA.	XM_001053004.1	109460536	✔	✔
0.015328	1.26101	down	Alkbh5	303193	alkB, alkylation repair homolog 5 (E. coli) (predicted) (Alkbh5_predicted), mRNA.	XM_220525.4	109488241	✔	✔
0.0131887	1.26232	down	Rtn4rl2	311169	reticulon 4 receptor-like 2 (Rtn4rl2), mRNA.	NM_181380.2	31341305	✔	✔
0.0139369	1.30161	down	Osbp2	305475	oxysterol binding protein 2 (predicted) (Osbp2_predicted), mRNA.	XM_223556.4	109499975	✔	✔
0.00365243	1.31396	down	Svop	171442	SV2 related protein (Svop), mRNA.	NM_134404.2	72534839	✔	✔
0.0461237	1.42746	down	Cbx1	360609	chromobox homolog 1 (Drosophila HP1 beta) (predicted) (Cbx1_predicted), mRNA.	XM_340885.3	109488885	✔	✔
0.00524041	1.71159	down	Eif2ak1	27137	eukaryotic translation initiation factor 2 alpha kinase 1 (Eif2ak1), mRNA.	NM_013223.1	6981045	✔	✔
0.000403468	1.2053	up	LOC498190	498190	hypothetical protein C130098D09 (LOC498190), mRNA.	XM_573406.1	62658986	✔	✔
0.0272118	1.2096	up	RGD1307465	296200	RIKEN cDNA 8430406I07 (RGD1307465), mRNA.	NM_001009655.1	57527056	✔	✔
0.00708144	1.21796	up	Bri3bp	498176	Bri3 binding protein (Bri3bp), mRNA.	NM_001017487.1	62945333	✔	✔
0.00141561	1.2229	up	Tpm1	24851	tropomyosin 1, alpha (Tpm1), transcript variant 9, mRNA.	NM_001034075.1	78000202	✔	✔
0.0373558	1.22809	up	Cyb5a	64001	cytochrome b5 type A (microsomal) (Cyb5a), mRNA.	NM_022245.1	11560045	✔	✔
0.0441547	1.22812	up	Ak2	24184	adenylate kinase 2 (Ak2), transcript variant 1, mRNA.	NM_030986.1	13591871	✔	✔
0.0158498	1.23595	up	Mdfic	362325	MyoD family inhibitor domain containing (predicted) (Mdfic_predicted), mRNA.	XM_342643.3	109471786	✔	✔
0.0264655	1.2453	up	Khdrbs3	64015	KH domain containing, RNA binding, signal transduction associated 3 (Khdrbs3), mRNA.	NM_022249.1	11560054	✔	✔
0.0184258	1.24961	up	Abcc3	140668	ATP-binding cassette, sub-family C (CFTR/MRP), member 3 (Abcc3), mRNA.	NM_080581.1	18034782	✔	✔
0.0487539	1.25968	up	Rbp1	25056	retinol binding protein 1, cellular (Rbp1), mRNA.	NM_012733.4	77416367	✔	✔
0.00920792	1.26187	up	Serpinb9	361241	serine (or cysteine) peptidase inhibitor, clade B, member 9 (Serpinb9), mRNA.	NM_001007732.1	56090430	✔	✔
0.00882895	1.2626	up	RGD1560938	362713	mKIAA1724 protein (predicted) (RGD1560938_predicted), mRNA.	XM_001069697.1	109479079	✔	✔
0.0430026	1.29243	up	Lrrn2	289020	leucine rich repeat protein 2, neuronal (predicted) (Lrrn2_predicted), mRNA.	XM_001060363.1	109498622	✔	✔
0.0488113	1.30255	up	Laptm4a	298875	lysosomal-associated protein transmembrane 4A (Laptm4a), mRNA.	NM_199384.1	40786458	✔	✔
0.034452	1.30294	up	Zdhhc12	366014	zinc finger, DHHC domain containing 12 (Zdhhc12), mRNA.	NM_001013239.1	61557397	✔	✔
0.0437774	1.32921	up	Amacr	25284	alpha-methylacyl-CoA racemase (Amacr), mRNA.	NM_012816.1	6981183	✔	✔
0.0112293	1.35919	up	Ctsh	25425	cathepsin H (Ctsh), mRNA.	NM_012939.1	6978720	✔	✔
0.0393436	1.36564	up	LOC311984	311984	RIKEN cDNA A530088I07 gene (LOC311984), mRNA.	XM_001062783.1	109472970	✔	✔
0.020109	1.43623	up	Depdc7	295971	DEP domain containing 7 (Depdc7), mRNA.	NM_001029916.1	71361616	✔	✔
0.000452787	1.45651	up	2010-09-01	293507	septin 1 (Sept1), mRNA.	NM_001012460.1	60223052	✔	✔
0.00778009	1.48348	up	Irgm	303090	immunity-related GTPase family, M (Irgm), mRNA.	NM_001012007.1	58865581	✔	✔
0.048844	1.4941	up	Mrps10	363187	mitochondrial ribosomal protein S10 (Mrps10), nuclear gene encoding mitochondrial protein, mRNA.	NM_001008859.1	57012443	✔	✔
0.00268048	1.51148	up	RGD1307506	294744	RIKEN cDNA 2310016C16 (predicted) (RGD1307506_predicted), mRNA.	XM_001067684.1	109465937	✔	✔
0.0101145	1.5488	up	Aldh1a1	24188	aldehyde dehydrogenase 1 family, member A1 (Aldh1a1), mRNA.	NM_022407.3	31542121	✔	✔
0.00890074	1.56668	up	Dlg7	289997	discs, large homolog 7 (Drosophila) (predicted) (Dlg7_predicted), mRNA.	XM_223937.3	62661268	✔	✔
0.000559124	1.82439	up	Dnmt3a	444984	DNA methyltransferase 3A (Dnmt3a), transcript variant 2, mRNA.	NM_001003957.1	51556264	✔	✔
0.01372	3.00444	up	Mx1	24575	myxovirus (influenza virus) resistance 1 (Mx1), mRNA.	NM_173096.2	71534286	✔	✔
0.00203368	1.20397	down	Hs3st5	294449	heparan sulfate (glucosamine) 3-O-sulfotransferase 5 (predicted) (Hs3st5_predicted), mRNA.	XM_228219.2	34852865		✔
0.0044535	1.20502	down	Hcfc1	363519	host cell factor C1 (predicted) (Hcfc1_predicted), mRNA.	XM_001057067.1	109462325		✔
0.0030238	1.22566	down	Ipmk	171458	inositol polyphosphate multikinase (Ipmk), mRNA.	NM_134417.1	19705554		✔
0.00898922	1.22635	down	RGD1310800	362269	RIKEN cDNA F730014I05 (predicted) (RGD1310800_predicted), mRNA.	XM_001070779.1	109471317		✔
0.012284	1.22978	down	Upf3a	361176	UPF3 regulator of nonsense transcripts homolog A (yeast) (Upf3a), mRNA.	NM_001012159.1	58865889		✔
0.00758859	1.23653	down	Rell2	361313	RELT-like 2 (Rell2), mRNA.	NM_001014149.1	62079024		✔
0.00174344	1.24077	down	LOC302612	302612	DNA segment, Chr X, Brigham & Womens Genetics 1396 expressed, isoform a (LOC302612), mRNA.	XM_217607.3	62666750		✔
0.0118448	1.24923	down	Mbd3	362834	methyl-CpG binding domain protein 3 (predicted) (Mbd3_predicted), mRNA.	XM_001076468.1	109481569		✔
0.000166221	1.28808	down	Rbm15b	315988	RNA binding motif protein 15B (predicted) (Rbm15b_predicted), mRNA.	XM_236613.4	109483937		✔
0.0472796	1.34512	down	RGD1564160	500973	solute carrier family 37 (glycerol-3-phosphate transporter), member 2 (predicted) (RGD1564160_predicted), mRNA.	XM_001061125.1	109484513		✔
0.00135018	1.34611	down	LOC499835	499835	MGC4707 protein isoform 4 (LOC499835), mRNA.	XM_575175.1	62645393		✔
0.00453634	1.43941	down	Abtb2	171440	ankyrin repeat and BTB (POZ) domain containing 2 (Abtb2), mRNA.	NM_134403.1	19705528		✔
0.0417071	1.90448	down	LOC363408	363408	RIKEN cDNA 2610042L04 (LOC363408), mRNA.	XM_576854.1	62718656		✔
0.0245151	1.21517	up	LOC310839	310839	dJ1033H22.1 (KIAA0554 protein) (predicted) (LOC310839), mRNA.	XM_227658.3	62644277		✔
0.0369894	1.21791	up	Irak2	362418	interleukin-1 receptor-associated kinase 2 (Irak2), mRNA.	NM_001025422.1	70794739		✔
0.030508	1.25131	up	Cyp26a1	154985	cytochrome P450, family 26, subfamily A, polypeptide 1 (Cyp26a1), mRNA.	NM_130408.1	18426827		✔
0.000109069	1.2719	up	LOC684681	684681	Histone H1.2 (H1 VAR.1) (H1c) (LOC684681), mRNA.	XM_001071565.1	109505800		✔
0.00410256	1.28178	up	RGD1304931	313776	RIKEN cDNA 2310042D19 (RGD1304931), mRNA.	XM_233725.3	62650193		✔
0.0481378	1.29916	up	Ssg1	64387	steroid sensitive gene 1 (Ssg1), mRNA.	XM_573284.2	109493223		✔
0.0371834	1.37732	up	Ctnna1	307505	catenin (cadherin associated protein), alpha 1 (Ctnna1), mRNA.	NM_001007145.1	55742754		✔
0.00273101	1.42116	up	LOC499148	499148	flt3 ligand (LOC499148), mRNA.	XM_574443.1	62639703		✔
0.0124196	1.43021	up	Tcirg1	293650	T-cell, immune regulator 1, ATPase, H+ transporting, lysosomal V0 subunit A3 (Tcirg1), mRNA.	NM_199089.2	86477161		✔
0.000652592	1.48281	up	Hla-dma	294274	major histocompatibility complex, class II, DM alpha (Hla-dma), mRNA.	NM_198741.1	38454219		✔
0.0143791	1.2	down	Kbtbd4	311185	kelch repeat and BTB (POZ) domain containing 4 (predicted) (Kbtbd4_predicted), mRNA.	XM_001077889.1	109470304	✓
0.0384588	1.20228	down	LOC689135	689135	Metabotropic glutamate receptor 3 precursor (mGluR3) (LOC689135), mRNA.	XM_001069691.1	109471656	✓
0.0358608	1.20278	down	Asxl2	313922	additional sex combs like 2 (Drosophila) (predicted) (Asxl2_predicted), mRNA.	XM_001066262.1	109479023	✓
0.0120841	1.20364	down	RGD1306921	305122	mKIAA1107 protein (predicted) (RGD1306921_predicted), mRNA.	XM_001061679.1	109500238	✓
0.0277704	1.2127	down	Usp1	313387	ubiquitin specific peptdiase 1 (Usp1), mRNA.	NM_001015015.1	62543524	✓
0.0219327	1.21323	down	RGD1310193	304289	KCCR13L (predicted) (RGD1310193_predicted), mRNA.	XM_001072224.1	109496612	✓
0.00447851	1.21744	down	Tomm34	311621	translocase of outer mitochondrial membrane 34 (predicted), transcript variant 2 (Tomm34_predicted), mRNA.	XM_001069958.1	109471266	✓
0.0258803	1.21975	down	Mkrn2	297525	makorin, ring finger protein, 2 (Mkrn2), mRNA.	NM_001008314.1	56605707	✓
0.0123199	1.22143	down	Usp19	361190	ubiquitin specific peptidase 19 (Usp19), mRNA.	NM_001001516.1	48040521	✓
0.0375982	1.22165	down	RGD1307907	362212	hypothetical protein FLJ14681 (predicted) (RGD1307907_predicted), mRNA.	XM_001081122.1	109470796	✓
0.0278101	1.22304	down	Hif1an	309434	hypoxia-inducible factor 1, alpha subunit inhibitor (predicted) (Hif1an_predicted), mRNA.	XM_219961.4	109460163	✓
3.15949e-05	1.22644	down	LOC501601	501601	riboflavin kinase (LOC501601), mRNA.	XM_577001.1	62667122	✓
0.0359246	1.2331	down	Gga1	300066	golgi associated, gamma adaptin ear containing, ARF binding protein 1 (Gga1), mRNA.	NM_001011994.1	58865563	✓
0.0380834	1.23349	down	Ttc30a1	311123	tetratricopeptide repeat domain 30A1 (Ttc30a1), mRNA.	NM_001029918.1	71361630	✓
0.00736399	1.23377	down	LOC306450	306450	Ten-m3 (LOC306450), mRNA.	XM_224840.3	62718688	✓
0.0162475	1.23704	down	Mllt3	114510	myeloid/lymphoid or mixed lineage-leukemia translocation to 3 homolog (Drosophila) (Mllt3), mRNA.	NM_053718.1	16758531	✓
0.0227615	1.23871	down	Neto2	307757	neuropilin (NRP) and tolloid (TLL)-like 2 (predicted) (Neto2_predicted), mRNA.	XM_001068307.1	109508529	✓
0.00882531	1.24092	down	Smarcc1	301020	SWI/SNF related, matrix associated, actin dependent regulator of chromatin, subfamily c, member 1 (predicted) (Smarcc1_predicted), mRNA.	XM_236644.4	109483983	✓
0.00263213	1.24605	down	Baalc	140720	brain and acute leukemia, cytoplasmic (Baalc), mRNA.	NM_144762.2	31377501	✓
0.0279417	1.24716	down	Apba3	83611	amyloid beta (A4) precursor protein-binding, family A, member 3 (Apba3), mRNA.	NM_031781.1	13929103	✓
0.0270814	1.24905	down	LOC360885	360885	hypothetical protein FLJ32001 (predicted) (LOC360885), mRNA.	XM_341160.2	62659847	✓
0.0151691	1.24909	down	RGD1310712	361607	EMSY protein (predicted) (RGD1310712_predicted), mRNA.	XM_001064849.1	109462442	✓
0.000315327	1.2507	down	Srrm1	313620	serine/arginine repetitive matrix 1 (predicted) (Srrm1_predicted), mRNA.	XM_001069368.1	109477500	✓
0.0153145	1.25633	down	Stk25	373542	serine/threonine kinase 25 (STE20 homolog, yeast) (Stk25), mRNA.	NM_184049.1	34576554	✓
0.046917	1.25921	down	Ddx18	308490	DEAD (Asp-Glu-Ala-Asp) box polypeptide 18 (Ddx18), mRNA.	NM_001006996.1	55741497	✓
0.00560983	1.26985	down	Col11a2	294279	collagen, type XI, alpha 2 (Col11a2), mRNA.	NM_212528.1	47087123	✓
0.00521967	1.27048	down	LOC690038	690038	Bcl2-associated athanogene 2 (LOC690038), mRNA.	XM_001073000.1	109485915	✓
0.00724715	1.27059	down	RGD1564007	300761	HCV NS3-transactivated protein 2 (predicted) (RGD1564007_predicted), mRNA.	XM_001073229.1	109484794	✓
0.0252733	1.27197	down	Taf2	170844	TAF2 RNA polymerase II, TATA box binding protein (TBP)-associated factor (Taf2), mRNA.	XM_343241.3	109480773	✓
0.0120288	1.27244	down	Map1a	25152	microtubule-associated protein 1A (Map1a), mRNA.	NM_030995.1	13591885	✓
0.0145986	1.27361	down	LOC290864	290864	Ubiquitin carboxyl-terminal hydrolase 4 (Ubiquitin thiolesterase 4) (Ubiquitin-specific processing protease 4) (Deubiquitinating enzyme 4) (Ubiquitous nuclear protein), transcript variant 3 (LOC290864), mRNA.	XM_001074632.1	109485324	✓
0.0476674	1.27486	down	Vldlr	25696	very low density lipoprotein receptor (Vldlr), mRNA.	NM_013155.1	6981705	✓
0.00832611	1.27787	down	Bdnf	24225	brain derived neurotrophic factor (Bdnf), mRNA.	NM_012513.2	46195817	✓
0.0198857	1.28031	down	Lphn3	170641	latrophilin 3 (Lphn3), mRNA.	NM_130822.1	18677754	✓
0.0144698	1.28147	down	Rnasen	310159	ribonuclease III, nuclear (Rnasen), mRNA.	XM_226843.4	109464508	✓
0.0265615	1.28501	down	Pfkfb2	24640	6-phosphofructo-2-kinase/fructose-2,6-biphosphatase 2 (Pfkfb2), transcript variant 2, mRNA.	NM_001033964.1	77020257	✓
0.0223273	1.28705	down	Nfil3	114519	nuclear factor, interleukin 3 regulated (Nfil3), mRNA.	NM_053727.2	48675849	✓
0.00229472	1.29811	down	Slc8a3	140448	solute carrier family 8 (sodium/calcium exchanger), member 3 (Slc8a3), mRNA.	NM_078620.1	17530968	✓
0.000652478	1.30525	down	Mkrn3	292988	makorin, ring finger protein, 3 (predicted) (Mkrn3_predicted), mRNA.	XM_001057262.1	109462072	✓
0.00118432	1.32327	down	Per2	63840	period homolog 2 (Drosophila) (Per2), mRNA.	NM_031678.1	13928941	✓
0.0325792	1.32638	down	Sui1-rs1	287703	suppressor of initiator codon mutations, related sequence 1 (S. cerevisiae) (predicted) (Sui1-rs1_predicted), mRNA.	XM_213456.4	109489011	✓
3.10729e-05	1.33113	down	Kcnj14	276720	potassium inwardly-rectifying channel, subfamily J, member 14 (Kcnj14), mRNA.	NM_170718.1	24962813	✓
0.00773054	1.34331	down	Scrn3	311731	secernin 3 (predicted) (Scrn3_predicted), mRNA.	XM_230990.3	62645248	✓
0.000622756	1.34761	down	LOC310086	310086	RIKEN cDNA D130064H19 (predicted) (LOC310086), mRNA.	XM_226757.3	62642914	✓
0.0226702	1.36482	down	Ntng2	311836	netrin G2 (predicted) (Ntng2_predicted), mRNA.	XM_242297.4	109467961	✓
0.00677401	1.38144	down	Mll2	362996	myeloid/lymphoid or mixed-lineage leukemia 2 (predicted) (Mll2_predicted), mRNA.	XM_001062568.1	109482864	✓
0.000372092	1.41751	down	Glmn	289437	FKBP-associated protein (Glmn), mRNA.	XM_213992.4	109499347	✓
0.0095433	1.43892	down	RGD1560924	500367	C230080I20Rik protein (predicted) (RGD1560924_predicted), mRNA.	XM_575725.2	109472847	✓
0.0160211	1.442	down	RGD1563888	360692	DNA segment, Chr 16, ERATO Doi 472, expressed (predicted) (RGD1563888_predicted), mRNA.	XM_001068357.1	109493895	✓
0.00725159	1.446	down	RGD1310191	360829	Ab2-034 (RGD1310191), mRNA.	XM_001080704.1	109497567	✓
0.0141251	1.45535	down	Mbc2	29579	membrane bound C2 domain containing protein (Mbc2), mRNA.	NM_017249.2	75832131	✓
0.028732	1.491	down	LOC501057	501057	Mtap4 protein (LOC501057), mRNA.	XM_345984.2	62654345	✓
0.00591467	1.58069	down	Col11a1	25654	procollagen, type XI, alpha 1 (Col11a1), mRNA.	XM_342325.3	109465413	✓
0.00112816	1.69048	down	Smc2l1	362519	SMC2 structural maintenance of chromosomes 2-like 1 (yeast) (predicted) (Smc2l1_predicted), mRNA.	XM_342837.3	109474910	✓
0.000165023	1.7919	down	Crh	81648	corticotropin releasing hormone (Crh), mRNA.	NM_031019.1	13591919	✓
0.0452616	1.92328	down	Birc6	313876	baculoviral IAP repeat-containing 6 (predicted) (Birc6_predicted), mRNA.	XM_001065439.1	109478991	✓
0.00457338	1.98135	down	Gdf15	29455	growth differentiation factor 15 (Gdf15), mRNA.	NM_019216.1	9506718	✓
0.0196311	2.10983	down	LOC684490	684490	Bifunctional methylenetetrahydrofolate dehydrogenase/cyclohydrolase, mitochondrial precursor, transcript variant 2 (LOC684490), mRNA.	XM_001067912.1	109473728	✓
0.012982	2.11212	down	RGD1564040	313410	methylenetetrahydrofolate dehydrogenase (NAD) (EC 1.5.1.15)/methenyltetrahydrofolate cyclohydrolase (EC 3.5.4.9) precursor (predicted) (RGD1564040_predicted), mRNA.	XM_001062502.1	109476847	✓
0.041411	1.20178	up	Srp14	296076	signal recognition particle 14 (predicted) (Srp14_predicted), mRNA.	XM_215815.4	109468652	✓
0.00400417	1.20255	up	Hebp1	362454	heme binding protein 1 (predicted) (Hebp1_predicted), mRNA.	XM_001071946.1	109474396	✓
0.0031371	1.21324	up	Csrp1	29276	cysteine and glycine-rich protein 1 (Csrp1), mRNA.	NM_017148.2	40538853	✓
0.0312776	1.21713	up	RGD1308251	362676	RIKEN cDNA 2810405K02 (predicted) (RGD1308251_predicted), mRNA.	XM_342993.3	109475908	✓
0.0210862	1.21771	up	RGD1308210	361601	RIKEN cDNA 2210412D01 (RGD1308210), mRNA.	XM_001068403.1	109462260	✓
0.00264298	1.22147	up	Map4k1	292763	mitogen activated protein kinase kinase kinase kinase 1 (predicted) (Map4k1_predicted), mRNA.	XM_001074916.1	109461587	✓
0.0305424	1.22215	up	Asgr1	24210	asialoglycoprotein receptor 1 (Asgr1), mRNA.	NM_012503.2	56961630	✓
0.0068233	1.2245	up	LOC679430	679430	hypothetical protein LOC679430 (LOC679430), mRNA.	XM_001056304.1	109510114	✓
0.00671711	1.22516	up	Polr3h	300088	polymerase (RNA) III (DNA directed) polypeptide H (predicted) (Polr3h_predicted), mRNA.	XM_001077109.1	109482539	✓
0.028776	1.24262	up	Ptn	24924	pleiotrophin (Ptn), mRNA.	NM_017066.2	42476133	✓
0.0262403	1.24361	up	Fhl3	313582	four and a half LIM domains 3 (predicted) (Fhl3_predicted), mRNA.	XM_001056311.1	109477200	✓
0.0214782	1.25853	up	Flna	293860	filamin, alpha (predicted) (Flna_predicted), mRNA.	XM_001056685.1	109462322	✓
0.0132778	1.2657	up	Tor2a	362112	torsin family 2, member A (Tor2a), mRNA.	NM_001007744.1	56090242	✓
0.0026369	1.27486	up	Srebf1	78968	sterol regulatory element binding factor 1 (Srebf1), mRNA.	XM_213329.4	109488157	✓
0.00947922	1.27649	up	Tspan4	293627	tetraspanin 4 (Tspan4), mRNA.	NM_001013070.1	61556865	✓
0.0128015	1.30782	up	Prps2	24689	phosphoribosyl pyrophosphate synthetase 2 (Prps2), mRNA.	NM_012634.1	6981417	✓
7.52309e-05	1.31167	up	Slc29a3	353307	solute carrier family 29 (nucleoside transporters), member 3 (Slc29a3), mRNA.	NM_181639.3	51036679	✓
0.00893359	1.31844	up	Gsto1	114846	glutathione S-transferase omega 1 (Gsto1), mRNA.	NM_001007602.1	56090549	✓
0.0027073	1.31984	up	RGD1561551	500359	Hypothetical protein MGC75664 (predicted) (RGD1561551_predicted), mRNA.	XM_001074172.1	109474452	✓
0.0158121	1.32404	up	Frmd8	309172	FERM domain containing 8 (Frmd8), mRNA.	NM_001008348.1	56605771	✓
0.0225128	1.32845	up	Arpp-19	60336	cyclic AMP phosphoprotein (Arpp-19), mRNA.	NM_031660.1	13928913	✓
0.0153736	1.33845	up	Zfyve21	362789	zinc finger, FYVE domain containing 21 (predicted) (Zfyve21_predicted), mRNA.	XM_001072133.1	109480022	✓
0.000135508	1.33871	up	Cib1	81823	calcium and integrin binding 1 (calmyrin) (Cib1), mRNA.	NM_031145.1	13592134	✓
0.00772033	1.34042	up	Ier3	294235	immediate early response 3 (Ier3), mRNA.	NM_212505.1	47059172	✓
0.0144322	1.34132	up	Il17rc	297520	interleukin 17 receptor C (predicted) (Il17rc_predicted), mRNA.	XM_216240.4	109472477	✓
0.0140751	1.36595	up	Sertad1	361526	SERTA domain containing 1 (Sertad1), mRNA.	NM_001007735.1	56090254	✓
0.00107016	1.36618	up	Cd151	64315	CD151 molecule (Raph blood group) (Cd151), mRNA.	NM_022523.1	11968105	✓
0.0243906	1.37689	up	Cntf	25707	ciliary neurotrophic factor (Cntf), mRNA.	NM_013166.1	6978674	✓
0.0368965	1.3827	up	Ssbp4	364534	single stranded DNA binding protein 4 (Ssbp4), mRNA.	NM_001014236.1	62079198	✓
0.00458484	1.38776	up	Gadd45g	291005	growth arrest and DNA-damage-inducible 45 gamma (Gadd45g), mRNA.	XM_001053888.1	109505494	✓
0.0101895	1.39679	up	RGD1564549	292654	hypothetical protein FLJ20512 (predicted) (RGD1564549_predicted), mRNA.	XM_214831.4	109458247	✓
0.0201017	1.39912	up	Tshr	25360	thyroid stimulating hormone receptor (Tshr), mRNA.	NM_012888.1	6981679	✓
0.0141069	1.40056	up	Sat2	360547	spermidine/spermine N1-acetyl transferase 2 (predicted) (Sat2_predicted), mRNA.	XM_340825.3	109488372	✓
0.0048346	1.4009	up	Plec1	64204	plectin 1 (Plec1), mRNA.	NM_022401.1	13540713	✓
0.0137347	1.40137	up	Fstl3	114031	follistatin-like 3 (Fstl3), mRNA.	NM_053629.2	31377479	✓
0.00431716	1.4106	up	Ebpl	361054	emopamil binding protein-like (predicted) (Ebpl_predicted), mRNA.	XM_001063508.1	109502541	✓
0.000155837	1.419	up	Arhgdib	362456	Rho, GDP dissociation inhibitor (GDI) beta (Arhgdib), mRNA.	NM_001009600.1	57527564	✓
0.00257672	1.42293	up	Cfd	54249	complement factor D (adipsin) (Cfd), mRNA.	XM_001077068.1	109481617	✓
0.00310166	1.44031	up	Spsb2	297592	splA/ryanodine receptor domain and SOCS box containing 2 (Spsb2), mRNA.	NM_001009660.1	57527097	✓
0.00244378	1.44195	up	Cdc42ep5	361505	CDC42 effector protein (Rho GTPase binding) 5 (predicted) (Cdc42ep5_predicted), mRNA.	XM_001070494.1	109461157	✓
0.00707669	1.46215	up	Junb	24517	jun B proto-oncogene (Junb), mRNA.	NM_021836.2	40254774	✓
0.00396707	1.46216	up	Igfbp3	24484	insulin-like growth factor binding protein 3 (Igfbp3), mRNA.	NM_012588.1	6981083	✓
0.0147437	1.46304	up	Lcp1	306071	lymphocyte cytosolic protein 1 (Lcp1), mRNA.	NM_001012044.1	58865655	✓
0.0427135	1.46627	up	RGD1562716	500254	T-complex protein 1, alpha subunit (TCP-1-alpha) (CCT-alpha) (predicted) (RGD1562716_predicted), mRNA.	XM_001075489.1	109473893	✓
0.00692127	1.47254	up	Decr1	117543	2,4-dienoyl CoA reductase 1, mitochondrial (Decr1), nuclear gene encoding mitochondrial protein, mRNA.	NM_057197.1	17105349	✓
0.00283505	1.49463	up	LOC363257	363257	mKIAA0657 protein (LOC363257), mRNA.	XM_343597.2	62655246	✓
0.00806542	1.49599	up	Sat1	302642	spermidine/spermine N1-acetyl transferase 1 (Sat1), mRNA.	NM_001007667.1	56090258	✓
0.00269892	1.50143	up	LOC498276	498276	Fc gamma (IgG) receptor II (low affinity) alpha precursor - rat (LOC498276), mRNA.	XM_573502.1	62659715	✓
0.0108399	1.52715	up	LOC497844	497844	hypothetical gene supported by NM_138846 (LOC497844), mRNA.	XM_579655.1	62666778	✓
0.000304101	1.52799	up	Qprt	293504	quinolinate phosphoribosyltransferase (Qprt), mRNA.	NM_001009646.1	57528251	✓
0.0134815	1.53768	up	Gmfg	113940	glia maturation factor, gamma (Gmfg), mRNA.	NM_181091.2	31341425	✓
0.0038903	1.56712	up	Tspo	24230	translocator protein (Tspo), mRNA.	NM_012515.1	6978574	✓
0.0016198	1.59377	up	LOC316130	316130	mannose-6-phosphate receptor binding protein 1 (LOC316130), mRNA.	XM_001061015.1	109486615	✓
0.0115334	1.63571	up	Ddah2	294239	dimethylarginine dimethylaminohydrolase 2 (Ddah2), mRNA.	NM_212532.1	47087078	✓
7.51229e-05	1.6387	up	Vamp5	89818	vesicle-associated membrane protein 5 (Vamp5), mRNA.	NM_053555.1	16758325	✓
0.0496907	1.65043	up	RGD1305283	363162	RIKEN cDNA 2010110K16 (predicted) (RGD1305283_predicted), mRNA.	XM_343501.3	109484062	✓
0.00925396	1.66559	up	Cd82	83628	CD82 antigen (Cd82), mRNA.	NM_031797.1	13929127	✓
0.000370183	1.6755	up	Pbxip1	310644	pre-B-cell leukemia transcription factor interacting protein 1 (Pbxip1), mRNA.	XM_227420.4	109465074	✓
0.00880152	1.80498	up	H2-M10.6	414787	histocompatibility 2, M region locus 10.6 (H2-M10.6), mRNA.	NM_001008851.1	57012413	✓
0.0014397	1.82661	up	Plp2	302562	proteolipid protein 2 (colonic epithelium-enriched) (Plp2), mRNA.	NM_207601.1	46485404	✓
0.00990622	1.86658	up	Fkbp10	360627	FK506 binding protein 10 (Fkbp10), mRNA.	NM_001014120.1	62078968	✓
0.0092988	1.94582	up	RGD1563438	287442	novel protein of unknown function (DUF423) family member (predicted) (RGD1563438_predicted), mRNA.	XM_213333.4	109488387	✓
0.0199753	2.0211	up	Stat1	25124	signal transducer and activator of transcription 1 (Stat1), transcript variant alpha, mRNA.	NM_032612.2	77695925	✓
8.92227e-05	2.02369	up	C1qc	362634	complement component 1, q subcomponent, C chain (C1qc), mRNA.	NM_001008524.1	56606097	✓
0.00185967	2.12774	up	RT1-149	414784	RT1 class I, T24, gene 4 (RT1-149), mRNA.	XM_579222.1	62665557	✓
0.00202009	2.44242	up	Lgals3	83781	lectin, galactose binding, soluble 3 (Lgals3), mRNA.	NM_031832.1	13929189	✓
0.000416863	3.38366	up	Mt1a	24567	metallothionein 1a (Mt1a), mRNA.	NM_138826.4	82617664	✓
0.0198586	1.20167	down	Ptpdc1	291022	protein tyrosine phosphatase domain containing 1 (predicted) (Ptpdc1_predicted), mRNA.	XM_001057150.1	109505563	✔
0.0208412	1.20241	down	Trpc3	60395	transient receptor potential cation channel, subfamily C, member 3 (Trpc3), mRNA.	NM_021771.1	11120727	✔
0.0147487	1.20385	down	Elavl1	363854	ELAV (embryonic lethal, abnormal vision, Drosophila)-like 1 (Hu antigen R) (predicted) (Elavl1_predicted), mRNA.	XM_344063.3	109494935	✔
0.00877621	1.20544	down	Aldoa	24189	aldolase A, fructose-bisphosphate (Aldoa), mRNA.	NM_012495.1	6978486	✔
0.0285755	1.20611	down	Cbll1	314028	Casitas B-lineage lymphoma-like 1 (predicted) (Cbll1_predicted), mRNA.	XM_234039.4	109478112	✔
0.026858	1.20742	down	LOC680014	680014	N-acetyltransferase ESCO1 (Establishment of cohesion 1 homolog 1) (ECO1 homolog 1) (LOC680014), mRNA.	XM_001055446.1	109506280	✔
0.0303882	1.20924	down	Sfrp2	310552	secreted frizzled-related protein 2 (Sfrp2), mRNA.	XM_227314.4	109464980	✔
0.0129774	1.21019	down	Ttc17	311224	tetratricopeptide repeat domain 17 (Ttc17), mRNA.	XM_001078737.1	109470357	✔
0.0113019	1.21138	down	Ppp1r15b	304799	protein phosphatase 1, regulatory (inhibitor) subunit 15b (predicted) (Ppp1r15b_predicted), mRNA.	XM_001060603.1	109498626	✔
0.0385058	1.21265	down	Gria3	29628	glutamate receptor, ionotropic, AMPA3 (alpha 3) (Gria3), mRNA.	NM_032990.1	15147225	✔
0.0209165	1.21283	down	LOC303222	303222	KIAA0672 gene product (predicted) (LOC303222), mRNA.	XM_220588.3	62656234	✔
0.0322923	1.21313	down	Thrap1	303403	thyroid hormone receptor associated protein 1 (predicted) (Thrap1_predicted), mRNA.	XM_220813.3	62656722	✔
0.0163983	1.21472	down	Rbm39	362251	RNA binding motif protein 39 (Rbm39), mRNA.	NM_001013207.1	61557286	✔
0.0134552	1.21599	down	RGD1560168	367307	RIKEN cDNA 4930429A22 (predicted) (RGD1560168_predicted), mRNA.	XM_346069.3	109486313	✔
0.00648696	1.21652	down	RGD1309489	314915	Est1p-like protein B (predicted) (RGD1309489_predicted), mRNA.	XR_008138.1	109482187	✔
0.00834186	1.21812	down	Ccpg1	363098	cell cycle progression 1 (predicted), transcript variant 3 (Ccpg1_predicted), mRNA.	XM_001053270.1	109484914	✔
0.013477	1.21898	down	Tmem68	312946	transmembrane protein 68 (predicted) (Tmem68_predicted), mRNA.	XM_001068973.1	109476077	✔
0.0197363	1.2195	down	RGD1560161	498515	Cadherin-like 24 (predicted) (RGD1560161_predicted), mRNA.	XM_573774.2	109501602	✔
0.00149206	1.21955	down	RGD1310474	314169	KIAA0423 (predicted) (RGD1310474_predicted), mRNA.	XM_234236.4	109478210	✔
0.0237233	1.21978	down	Vsnl1	24877	visinin-like 1 (Vsnl1), mRNA.	NM_012686.2	62461576	✔
0.0130298	1.2201	down	Smg7	360855	Smg-7 homolog, nonsense mediated mRNA decay factor (C. elegans) (predicted) (Smg7_predicted), mRNA.	XM_341132.3	109498023	✔
0.0383526	1.22203	down	Dnm1l	114114	dynamin 1-like (Dnm1l), mRNA.	NM_053655.2	77917613	✔
0.00238642	1.22254	down	Clk4	287269	CDC like kinase 4 (Clk4), mRNA.	NM_001013041.1	61556772	✔
0.018346	1.2231	down	Rock1	81762	Rho-associated coiled-coil containing protein kinase 1 (Rock1), mRNA.	NM_031098.1	13592048	✔
0.00595079	1.22364	down	Wwp1	297930	WW domain containing E3 ubiquitin protein ligase 1 (Wwp1), mRNA.	NM_001024757.1	67078497	✔
0.0366612	1.22513	down	RGD1565135	304294	E3 ubiquitin ligase TRIAD3B (predicted) (RGD1565135_predicted), mRNA.	XM_221922.4	109495209	✔
0.00681248	1.22596	down	Piga_mapped	363464	phosphatidylinositol glycan, class A (mapped) (Piga_mapped), mRNA.	XM_001067339.1	109511699	✔
0.0188509	1.2263	down	LOC689560	689560	ryanodine receptor 2, cardiac (LOC689560), mRNA.	XR_006681.1	109505144	✔
0.00194148	1.22646	down	Grm1	24414	glutamate receptor, metabotropic 1 (Grm1), transcript variant 1, mRNA.	NM_017011.1	8393486	✔
0.00259319	1.2297	down	Frs3	316213	fibroblast growth factor receptor substrate 3 (Frs3), mRNA.	NM_001017382.1	62821835	✔
0.0395216	1.22998	down	Atp1a3	24213	ATPase, Na+/K+ transporting, alpha 3 polypeptide (Atp1a3), mRNA.	NM_012506.1	6978546	✔
0.0306279	1.23065	down	LOC364763	364763	GTP-binding protein NGB (LOC364763), mRNA.	XM_344621.2	62663757	✔
0.00856338	1.23109	down	Kcnc2	246153	potassium voltage gated channel, Shaw-related subfamily, member 2 (Kcnc2), transcript variant a, mRNA.	NM_139216.1	41281705	✔
0.0271929	1.23114	down	Dusp12	64014	dual specificity phosphatase 12 (Dusp12), mRNA.	NM_022248.1	11560051	✔
0.0030533	1.23192	down	Kcnc1	25327	potassium voltage gated channel, Shaw-related subfamily, member 1, transcript variant 2 (Kcnc1), mRNA.	XM_001080138.1	109461984	✔
0.0118983	1.23222	down	Ahcyl1	362013	S-adenosylhomocysteine hydrolase-like 1 (predicted) (Ahcyl1_predicted), mRNA.	XM_342312.3	109465433	✔
0.012939	1.23394	down	Zfp131	310375	zinc finger protein 131 (Zfp131), mRNA.	XM_227104.4	109464425	✔
0.0143468	1.23524	down	Pigm	79112	phosphatidylinositol glycan anchor biosynthesis, class M (Pigm), mRNA.	NM_024144.1	13162328	✔
0.00378505	1.23641	down	Tmprss5	266681	transmembrane protease, serine 5 (spinesin) (Tmprss5), mRNA.	NM_153311.1	23463310	✔
0.0457215	1.23652	down	RGD1565673	499766	RNA polymerase I transcription termination factor 1 (predicted) (RGD1565673_predicted), mRNA.	XM_575102.2	109467973	✔
0.0280653	1.23691	down	2011-03-01	361135	membrane-associated ring finger (C3HC4) 1 (predicted) (March1_predicted), mRNA.	XM_001071042.1	109504041	✔
0.00346681	1.2444	down	Ireb2	64831	iron responsive element binding protein 2 (Ireb2), mRNA.	NM_022863.1	12408321	✔
0.0108656	1.24533	down	Dzip1	364475	DAZ interacting protein 1 (Dzip1), mRNA.	XM_001078447.1	109502943	✔
0.0488508	1.24678	down	RGD1562371	498819	GREB1 protein isoform a (predicted) (RGD1562371_predicted), mRNA.	XM_574101.2	109506293	✔
3.5105e-05	1.24714	down	Lyar	289707	Ly1 antibody reactive homolog (mouse) (Lyar), mRNA.	NM_001011911.1	58865391	✔
0.00203968	1.2483	down	RGD1306332	299507	HCV NS3-transactivated protein 1 (predicted) (RGD1306332_predicted), mRNA.	XM_001060870.1	109487062	✔
0.0409046	1.24996	down	RGD1306245	308493	CLIP-170-related protein (predicted) (RGD1306245_predicted), mRNA.	XM_001078996.1	109461639	✔
0.00938753	1.24997	down	RGD1310271	313778	hypothetical protein MGC45873 (predicted) (RGD1310271_predicted), mRNA.	XM_233727.4	109475920	✔
0.00454255	1.25357	down	Cntn4	116658	contactin 4 (Cntn4), mRNA.	NM_053879.1	16758745	✔
0.0320247	1.25383	down	Akap10	360540	A kinase (PRKA) anchor protein 10 (predicted) (Akap10_predicted), mRNA.	XM_573108.2	109488188	✔
0.0129746	1.25383	down	LOC304923	304923	hypothetical protein FLJ11752 (LOC304923), mRNA.	XM_222823.4	109498112	✔
0.0116897	1.25974	down	RGD1566149	497960	CDNA sequence BC017647 (predicted) (RGD1566149_predicted), mRNA.	XM_573150.2	109488588	✔
0.0233743	1.26017	down	Xpo1	85252	exportin 1, CRM1 homolog (yeast) (Xpo1), mRNA.	NM_053490.1	29789298	✔
0.00711964	1.26062	down	Dclk1	83825	doublecortin-like kinase 1 (Dclk1), mRNA.	NM_053343.2	31340568	✔
0.00371343	1.26195	down	Plcl1	84587	phospholipase C-like 1 (Plcl1), mRNA.	NM_053456.1	16758195	✔
0.00152678	1.26443	down	RGD1311663	292548	RIKEN cDNA A230102I05 (predicted) (RGD1311663_predicted), mRNA.	XM_001067437.1	109461071	✔
0.00404049	1.26686	down	Wdr75	314545	WD repeat domain 75 (Wdr75), mRNA.	XM_001060763.1	109487059	✔
0.00557126	1.26997	down	RGD1307395	297942	SR rich protein (RGD1307395), mRNA.	XM_001060221.1	109474685	✔
0.0322771	1.27144	down	Brwd1	304061	bromodomain and WD repeat domain containing 1 (predicted) (Brwd1_predicted), mRNA.	XM_221627.4	109492864	✔
0.0306494	1.27352	down	Mtf1	362591	metal response element binding transcription factor 1 (predicted) (Mtf1_predicted), mRNA.	XM_001055855.1	109477194	✔
0.0309083	1.27367	down	LOC500663	500663	serologically defined colon cancer antigen 1 isoform a (LOC500663), mRNA.	XM_576041.1	62650772	✔
0.0210043	1.27447	down	Slc25a16	361836	solute carrier family 25 (mitochondrial carrier, Graves disease autoantigen), member 16 (Slc25a16), mRNA.	XM_001080562.1	109510043	✔
0.0205572	1.27567	down	Dlat	81654	dihydrolipoamide S-acetyltransferase (Dlat), mRNA.	NM_031025.1	78365254	✔
0.0176959	1.28114	down	RGD1563465	295382	netrin G1 (predicted) (RGD1563465_predicted), mRNA.	XM_227605.4	109465397	✔
0.0180909	1.28193	down	Ebf1	116543	early B-cell factor 1 (Ebf1), mRNA.	NM_053820.1	16758667	✔
0.0228051	1.2863	down	LOC680424	680424	Peroxisome assembly protein 10 (Peroxin-10) (Peroxisome biogenesis factor 10) (RING finger protein 69) (LOC680424), mRNA.	XM_001057106.1	109475918	✔
0.0169872	1.29356	down	Mllt11	295264	myeloid/lymphoid or mixed-lineage leukemia (trithorax homolog, Drosophila); translocated to, 11 (Mllt11), mRNA.	NM_001013912.1	62078554	✔
0.0164511	1.29608	down	Unc13c	286931	unc-13 homolog C (C. elegans) (Unc13c), mRNA.	NM_173146.1	27465622	✔
0.0255478	1.29689	down	LOC289855	289855	KIAA1912 protein (predicted) (LOC289855), mRNA.	XM_223723.3	62660931	✔
0.0447243	1.30044	down	Rb1	24708	retinoblastoma 1 (Rb1), mRNA.	XM_344434.3	109501743	✔
0.00131608	1.30199	down	Tmeff1	63845	transmembrane protein with EGF-like and two follistatin-like domains 1 (Tmeff1), mRNA.	XM_001055768.1	109476483	✔
0.00388497	1.30275	down	Cdh11	84407	cadherin 11 (Cdh11), mRNA.	XM_001059464.1	109507685	✔
0.00935071	1.30415	down	Tbc1d15	366896	TBC1 domain family, member 15 (Tbc1d15), mRNA.	XM_345825.3	109480516	✔
0.00462205	1.30568	down	Inpp4b	116699	inositol polyphosphate-4-phosphatase, type II (Inpp4b), mRNA.	NM_053917.1	16758795	✔
0.0440526	1.30629	down	Psmd5	296651	proteasome (prosome, macropain) 26S subunit, non-ATPase, 5 (predicted) (Psmd5_predicted), mRNA.	XM_216041.4	109468056	✔
0.0473078	1.31005	down	LOC300768	300768	KIAA0925 protein (LOC300768), mRNA.	XM_217183.3	62653789	✔
0.0115528	1.31136	down	Grk1	81760	G protein-coupled receptor kinase 1 (Grk1), mRNA.	NM_031096.1	13592044	✔
0.00282186	1.32949	down	Hiat1	295398	hippocampus abundant gene transcript 1 (predicted) (Hiat1_predicted), mRNA.	XM_001067587.1	109461075	✔
0.0207623	1.34135	down	Actb	81822	actin, beta (Actb), mRNA.	NM_031144.2	42475962	✔
0.0221126	1.35062	down	Dmd	24907	dystrophin, muscular dystrophy (Dmd), transcript variant Dp71c, mRNA.	NM_001005246.1	52630319	✔
0.000503205	1.35368	down	RGD1306880	313553	hypothetical protein MGC47816 (predicted) (RGD1306880_predicted), mRNA.	XM_001073980.1	109477128	✔
0.0243888	1.35613	down	Slc17a7	116638	solute carrier family 17 (sodium-dependent inorganic phosphate cotransporter), member 7 (Slc17a7), mRNA.	NM_053859.1	16758725	✔
0.00220253	1.37962	down	Sec24a	287275	SEC24 related gene family, member A (S. cerevisiae) (predicted) (Sec24a_predicted), mRNA.	XM_001073105.1	109490668	✔
0.00555489	1.39099	down	Srebf2	300095	sterol regulatory element binding transcription factor 2 (Srebf2), mRNA.	NM_001033694.1	76096331	✔
0.0148415	1.40437	down	RGD1559637	502596	FLJ44691 protein (predicted) (RGD1559637_predicted), mRNA.	XM_001076757.1	109467629	✔
0.0132031	1.40691	down	LOC310926	310926	Ac1147 (LOC310926), mRNA.	XM_227769.2	62718010	✔
0.0499597	1.41311	down	Ppef1	317498	protein phosphatase, EF-hand calcium binding domain 1 (Ppef1), mRNA.	NM_001034935.1	77917563	✔
0.00363335	1.42773	down	Mysm1	298247	myb-like, SWIRM and MPN domains 1 (predicted) (Mysm1_predicted), mRNA.	XM_001058020.1	109476785	✔
0.0282099	1.42989	down	Klhl6	287974	kelch-like 6 (Drosophila) (predicted) (Klhl6_predicted), mRNA.	XM_001062279.1	109494681	✔
0.00794775	1.45052	down	Hmga1	117062	high mobility group AT-hook 1 (Hmga1), mRNA.	NM_139327.1	21326450	✔
0.0103749	1.55173	down	RGD1308087	305861	RIKEN cDNA 4932432K03 (RGD1308087), mRNA.	NM_001030036.1	71795649	✔
0.0276276	1.55386	down	Cav1	25404	caveolin, caveolae protein 1 (Cav1), transcript variant 1, mRNA.	NM_031556.1	19526760	✔
0.0257694	1.55733	down	Kcnc2	246153	potassium voltage gated channel, Shaw-related subfamily, member 2 (Kcnc2), transcript variant b, mRNA.	NM_139217.1	21217558	✔
0.0026242	1.57519	down	RGD1563268	499073	Probable serine/threonine-protein kinase KIAA1811 (predicted) (RGD1563268_predicted), mRNA.	XM_001071463.1	109461186	✔
0.0038599	1.61598	down	Smarcd1	363002	SWI/SNF related, matrix associated, actin dependent regulator of chromatin, subfamily d, member 1 (predicted) (Smarcd1_predicted), mRNA.	XM_343332.3	109481276	✔
0.00781522	1.79653	down	Car14	361998	carbonic anhydrase 14 (predicted) (Car14_predicted), mRNA.	XM_342297.2	62643906	✔
0.0261756	1.20146	up	Ptpn6	116689	protein tyrosine phosphatase, non-receptor type 6 (Ptpn6), mRNA.	NM_053908.1	16758787	✔
0.014285	1.20163	up	Fam158a	290224	family with sequence similarity 158, member A (Fam158a), mRNA.	NM_001008296.1	56605633	✔
0.0126378	1.20166	up	Tmem98	303356	transmembrane protein 98 (Tmem98), mRNA.	NM_001007672.1	56090464	✔
0.0442279	1.20362	up	Emcn	295490	endomucin (Emcn), mRNA.	NM_001004228.1	51948431	✔
0.0240081	1.213	up	Ethe1	292710	ethylmalonic encephalopathy 1 (predicted) (Ethe1_predicted), mRNA.	XM_001076689.1	109461415	✔
0.0294273	1.21424	up	Ifitm6	309104	interferon induced transmembrane protein 6 (predicted) (Ifitm6_predicted), mRNA.	XM_219476.3	62641592	✔
0.0393321	1.21923	up	Tcf19	406195	transcription factor 19 (Tcf19), mRNA.	NM_213561.2	78187976	✔
0.0393442	1.22112	up	Dynlt1	83462	dynein light chain Tctex-type 1 (Dynlt1), mRNA.	NM_031318.1	13786137	✔
0.0340321	1.22123	up	Skap2	155183	src kinase associated phosphoprotein 2 (Skap2), mRNA.	NM_130413.1	18426837	✔
0.01078	1.22136	up	RGD1310324	287388	hypothetical LOC287388 (predicted) (RGD1310324_predicted), mRNA.	XR_009188.1	109490969	✔
0.00841631	1.22346	up	Ptafr	58949	platelet-activating factor receptor (Ptafr), mRNA.	NM_053321.2	48675848	✔
0.00251333	1.22368	up	Psme2	29614	proteasome (prosome, macropain) 28 subunit, beta (Psme2), mRNA.	NM_017257.2	67972658	✔
0.0035033	1.22494	up	Ogfrl1	316290	opioid growth factor receptor-like 1 (Ogfrl1), mRNA.	NM_001025708.1	71043627	✔
0.00643923	1.22715	up	LOC501203	501203	Myosin regulatory light chain 2-A, smooth muscle isoform (Myosin RLC-A) (LOC501203), mRNA.	XM_343643.2	62655534	✔
0.04787	1.2273	up	Mrpl27	287635	mitochondrial ribosomal protein L27 (predicted) (Mrpl27_predicted), mRNA.	XM_001081298.1	109491691	✔
0.0165917	1.22907	up	Serpina11	362774	serine (or cysteine) peptidase inhibitor, clade A (alpha-1 antiproteinase, antitrypsin), member 11 (Serpina11), mRNA.	NM_001008776.1	56912217	✔
0.0250933	1.22976	up	RGD1566212	499512	ATP synthase, H+ transporting, mitochondrial F0 complex, subunit c (subunit 9), isoform 2 (predicted) (RGD1566212_predicted), mRNA.	XM_574837.2	109464268	✔
0.00235218	1.23065	up	2010-03-02	362849	membrane-associated ring finger (C3HC4) 2 (March2), mRNA.	NM_001034108.1	77628147	✔
0.0253024	1.23186	up	Gstp1	24426	glutathione-S-transferase, pi 1 (Gstp1), mRNA.	NM_012577.1	25453419	✔
0.0326291	1.2331	up	Cox5b	94194	cytochrome c oxidase subunit Vb (Cox5b), mRNA.	NM_053586.1	16758361	✔
0.0251416	1.23374	up	Trpv4	66026	transient receptor potential cation channel, subfamily V, member 4 (Trpv4), mRNA.	NM_023970.1	13027423	✔
0.00681492	1.23993	up	Ostf1	259275	osteoclast stimulating factor 1 (Ostf1), mRNA.	NM_148892.2	61889109	✔
0.02618	1.24138	up	LOC287564	287564	hypothetical protein (LOC287564), mRNA.	XM_237794.3	62656652	✔
0.0377479	1.24194	up	Nola2	287273	nucleolar protein family A, member 2 (predicted) (Nola2_predicted), mRNA.	XM_213293.3	109488035	✔
0.0273357	1.24238	up	Anxa5	25673	annexin A5 (Anxa5), mRNA.	NM_013132.1	6978504	✔
0.0133399	1.24253	up	RGD1311307	361238	1300014I06Rik protein (RGD1311307), mRNA.	NM_001025719.1	71043777	✔
0.0164379	1.24297	up	Psmb3	29676	proteasome (prosome, macropain) subunit, beta type 3 (Psmb3), mRNA.	NM_017285.1	8394081	✔
0.018464	1.24317	up	Psmb6	29666	proteasome (prosome, macropain) subunit, beta type 6 (Psmb6), mRNA.	NM_057099.2	54019418	✔
0.0134751	1.24424	up	Tcta	306587	T-cell leukemia translocation altered gene (Tcta), mRNA.	NM_001014005.1	62078738	✔
0.0176025	1.24709	up	Cyp27a1	301517	cytochrome P450, family 27, subfamily a, polypeptide 1 (Cyp27a1), mRNA.	NM_178847.1	30578395	✔
0.00465841	1.24944	up	RGD1560566	308986	RGD1560566 (predicted) (RGD1560566_predicted), mRNA.	XM_001080074.1	109462894	✔
0.00523725	1.2552	up	Tax1bp3	360564	Tax1 (human T-cell leukemia virus type I) binding protein 3 (Tax1bp3), mRNA.	NM_001025419.1	70794745	✔
0.00837826	1.25661	up	Flot1	64665	flotillin 1 (Flot1), mRNA.	NM_022701.1	12083662	✔
0.0352922	1.25703	up	Mrps33	296995	mitochondrial ribosomal protein S33 (predicted) (Mrps33_predicted), mRNA.	XM_001070269.1	109473381	✔
0.0147781	1.25724	up	Lhpp	361663	phospholysine phosphohistidine inorganic pyrophosphate phosphatase (Lhpp), mRNA.	NM_001009706.1	57528358	✔
0.0316209	1.26219	up	Ifngr2	360697	interferon gamma receptor 2 (predicted) (Ifngr2_predicted), mRNA.	XM_340967.3	109492935	✔
0.0330248	1.2635	up	Myc	24577	myelocytomatosis oncogene (Myc), mRNA.	NM_012603.2	51491887	✔
0.0463351	1.2638	up	Tmbim4	362884	transmembrane BAX inhibitor motif containing 4 (Tmbim4), mRNA.	NM_199116.1	40018603	✔
0.0221627	1.26407	up	Gja4	25655	gap junction protein, alpha 4 (Gja4), mRNA.	NM_021654.2	51036648	✔
0.0234646	1.26432	up	Gamt	25257	guanidinoacetate N-methyltransferase (Gamt), mRNA.	NM_012793.1	6978872	✔
0.0132506	1.26489	up	RGD1565999	297805	short chain dehydrogenase reductase 9 (predicted) (RGD1565999_predicted), mRNA.	XM_001069656.1	109476086	✔
0.0168206	1.2668	up	LOC292072		Adenine phosphoribosyltransferase (APRT) (LOC292072), mRNA.	XM_214704.1	27659491	✔
0.027269	1.26807	up	Dpysl3	25418	dihydropyrimidinase-like 3 (Dpysl3), mRNA.	NM_012934.1	25742567	✔
0.030589	1.27111	up	Rnaset2	292306	ribonuclease T2 (predicted) (Rnaset2_predicted), mRNA.	XM_214769.4	109457773	✔
0.0322046	1.27147	up	Nrm	361791	nurim (nuclear envelope membrane protein) (Nrm), mRNA.	NM_212508.1	47059198	✔
0.0236006	1.27362	up	Cox17	89786	cytochrome c oxidase, subunit XVII assembly protein homolog (S. cerevisiae) (Cox17), mRNA.	NM_053540.1	16758307	✔
0.0295136	1.27721	up	Efemp2	293677	EGF-containing fibulin-like extracellular matrix protein 2 (Efemp2), mRNA.	XM_001070338.1	109463379	✔
0.0356644	1.2773	up	Scn7a	64155	sodium channel, voltage-gated, type VII, alpha (Scn7a), mRNA.	NM_031686.1	25742827	✔
0.00588993	1.27782	up	Vkorc1	309004	vitamin K epoxide reductase complex, subunit 1 (Vkorc1), mRNA.	NM_203335.2	45827740	✔
0.02803	1.2784	up	Nme2	83782	non-metastatic cells 2, protein (NM23B) expressed in (Nme2), mRNA.	NM_031833.2	55926144	✔
0.0125852	1.27906	up	Adora2b	29316	adenosine A2B receptor (Adora2b), mRNA.	NM_017161.1	8392863	✔
0.0212302	1.28188	up	Xrcc5	363247	X-ray repair complementing defective repair in Chinese hamster cells 5 (Xrcc5), mRNA.	NM_177419.1	41056214	✔
0.00236142	1.28673	up	Nmi	311021	N-myc (and STAT) interactor (Nmi), mRNA.	NM_001034148.1	77627730	✔
0.0187298	1.29401	up	Sec11c	266758	SEC11 homolog C (S. cerevisiae) (Sec11c), mRNA.	NM_153628.1	24025633	✔
0.0224695	1.29489	up	Mkl1	315151	megakaryoblastic leukemia (translocation) 1 (predicted) (Mkl1_predicted), mRNA.	XM_001077101.1	109482601	✔
0.0164719	1.30079	up	Fxyd7	63848	FXYD domain-containing ion transport regulator 7 (Fxyd7), mRNA.	NM_022008.1	11612662	✔
0.0470647	1.30494	up	LOC687840	687840	Glutathione S-transferase alpha-4 (Glutathione S-transferase Yk) (GST Yk) (GST 8-8) (GST K) (GST A4-4) (LOC687840), mRNA.	XM_001080312.1	109479468	✔
0.000541103	1.30695	up	Phgdh	58835	3-phosphoglycerate dehydrogenase (Phgdh), mRNA.	NM_031620.1	13928849	✔
0.0483654	1.31661	up	Eppb9	287383	endothelial precursor protein B9 (predicted) (Eppb9_predicted), mRNA.	XM_213314.4	109488173	✔
0.0353373	1.31692	up	Spsb1	313722	splA/ryanodine receptor domain and SOCS box containing 1 (predicted) (Spsb1_predicted), mRNA.	XM_001075317.1	109477725	✔
0.0346551	1.32071	up	Acyp1	299203	acylphosphatase 1, erythrocyte (common) type (predicted) (Acyp1_predicted), mRNA.	XM_001060176.1	109479685	✔
0.0156127	1.3227	up	RGD1307150	301016	Esophagus cancer-related gene-2 protein precursor (ECRG-2) (predicted) (RGD1307150_predicted), mRNA.	XM_217268.3	109483972	✔
0.0110105	1.32967	up	Adfp	298199	adipose differentiation related protein (Adfp), mRNA.	NM_001007144.1	55742861	✔
0.0053735	1.33016	up	Np_mapped	290029	nucleoside phosphorylase (mapped) (Np_mapped), mRNA.	XM_214155.4	109501551	✔
0.039324	1.33276	up	Psmb10	291983	proteasome (prosome, macropain) subunit, beta type 10 (Psmb10), mRNA.	NM_001025637.1	71043723	✔
0.024883	1.33761	up	Hrsp12	65151	heat-responsive protein 12 (Hrsp12), mRNA.	NM_031714.1	14269571	✔
0.031081	1.33937	up	LOC687579	687579	mitochondria-associated granulocyte macrophage CSF signaling molecule (LOC687579), mRNA.	XM_001079231.1	109489723	✔
0.0334241	1.34093	up	S100a13	295213	S100 calcium binding protein A13 (predicted) (S100a13_predicted), mRNA.	XM_215607.3	109465106	✔
0.0203109	1.34309	up	Cxcl1	81503	chemokine (C-X-C motif) ligand 1 (melanoma growth stimulating activity, alpha) (Cxcl1), mRNA.	NM_030845.1	13540651	✔
0.00146997	1.34936	up	Pdlim3	114108	PDZ and LIM domain 3 (Pdlim3), mRNA.	NM_053650.1	25742665	✔
0.00193116	1.34981	up	Ctsc	25423	cathepsin C (Ctsc), mRNA.	NM_017097.1	8393217	✔
0.0488755	1.35049	up	RGD1560328	499317	UPF0197 protein C11orf10 homolog (predicted) (RGD1560328_predicted), mRNA.	XM_001074464.1	109463525	✔
9.16348e-05	1.35081	up	RGD1560673	361423	FLJ44299 protein (predicted) (RGD1560673_predicted), mRNA.	XM_001078819.1	109508979	✔
0.0102147	1.35101	up	LOC499828	499828	copine VIII isoform 1 (LOC499828), mRNA.	XM_001076779.1	109470260	✔
0.00895807	1.3615	up	Gstp2	29438	glutathione S-transferase, pi 2 (Gstp2), mRNA.	NM_138974.1	25453411	✔
0.028245	1.36154	up	LOC311772	311772	nidogen 2 (LOC311772), mRNA.	XM_231028.3	62644671	✔
0.0155108	1.36245	up	Crip2	338401	cysteine-rich protein 2 (Crip2), mRNA.	NM_022501.1	11968067	✔
0.0250484	1.36297	up	Rpl39	25347	ribosomal protein L39 (Rpl39), mRNA.	NM_012875.1	6981483	✔
3.09117e-05	1.36376	up	Atp6v0e1	94170	ATPase, H+ transporting, lysosomal 9kDa, V0 subunit e1 (Atp6v0e1), mRNA.	NM_053578.3	50659076	✔
0.0040469	1.37051	up	Aplnr	83518	apelin receptor (Aplnr), mRNA.	NM_031349.2	48675846	✔
0.0375932	1.376	up	Icam1	25464	intercellular adhesion molecule 1 (Icam1), mRNA.	NM_012967.1	6981067	✔
0.00931587	1.38607	up	Lamp2	24944	lysosomal-associated membrane protein 2 (Lamp2), mRNA.	NM_017068.2	40254784	✔
0.0249596	1.38671	up	Nqo1	24314	NAD(P)H dehydrogenase, quinone 1 (Nqo1), mRNA.	NM_017000.2	27501443	✔
0.017609	1.39031	up	Ush3a	261738	Usher syndrome type III A (Ush3a), mRNA.	XM_346620.2	62643276	✔
0.0132271	1.39047	up	Mgst3	289197	microsomal glutathione S-transferase 3 (predicted) (Mgst3_predicted), mRNA.	XM_001076104.1	109498992	✔
0.00116704	1.39151	up	Fcgr3a	304966	Fc fragment of IgG, low affinity IIIa, receptor (Fcgr3a), mRNA.	NM_207603.1	46485397	✔
0.00134347	1.3963	up	Fscn2	303741	fascin homolog 2, actin-bundling protein, retinal (Strongylocentrotus purpuratus) (predicted) (Fscn2_predicted), mRNA.	XM_221196.3	109489467	✔
0.00665227	1.39782	up	Lgals1	56646	lectin, galactose binding, soluble 1 (Lgals1), mRNA.	NM_019904.1	9845260	✔
0.0132097	1.40189	up	Chdh	290551	choline dehydrogenase (Chdh), mRNA.	NM_198731.2	55741626	✔
0.0018696	1.40391	up	S100a16	361991	S100 calcium binding protein A16 (predicted) (S100a16_predicted), mRNA.	XM_342291.3	109465100	✔
0.0185156	1.40912	up	S100a3	114216	S100 calcium binding protein A3 (S100a3), mRNA.	NM_053681.1	16758495	✔
0.00136473	1.40991	up	Fcgrt	29558	Fc fragment of IgG, receptor, transporter, alpha (Fcgrt), mRNA.	NM_033351.1	15375321	✔
0.0135379	1.40992	up	Gstm1	24423	glutathione S-transferase, mu 1 (Gstm1), mRNA.	NM_017014.1	8393501	✔
0.000242462	1.41377	up	Plek	364206	pleckstrin (Plek), mRNA.	NM_001025750.1	71043673	✔
0.00430288	1.41385	up	Rgs10	54290	regulator of G-protein signalling 10 (Rgs10), mRNA.	XM_001079315.1	109462949	✔
0.00324199	1.41742	up	Tmem63a	289318	transmembrane protein 63a (predicted) (Tmem63a_predicted), mRNA.	XM_223000.4	109498278	✔
0.0230008	1.4327	up	C1qa	298566	complement component 1, q subcomponent, alpha polypeptide (C1qa), mRNA.	NM_001008515.1	56606081	✔
0.00398419	1.43503	up	Fxyd1	58971	FXYD domain-containing ion transport regulator 1 (Fxyd1), mRNA.	NM_031648.1	13928895	✔
0.0468566	1.43738	up	Mgp	25333	matrix Gla protein (Mgp), mRNA.	NM_012862.1	6981203	✔
0.0435962	1.43777	up	Irf9	305896	interferon regulatory factor 9 (Irf9), mRNA.	NM_001012041.1	58865657	✔
0.031878	1.44275	up	C4-2	406161	complement component 4, gene 2 (C4-2), mRNA.	NM_001002805.1	50657361	✔
0.0439407	1.44576	up	RGD1309427	291081	tubulin, beta-like (RGD1309427_predicted), mRNA.	XM_238004.3	62663463	✔
0.0155466	1.44613	up	RGD1562162	366481	Zgc:56193 (predicted) (RGD1562162_predicted), mRNA.	XR_008163.1	109477420	✔
0.00059649	1.45344	up	Slc2a5	65197	solute carrier family 2 (facilitated glucose/fructose transporter), member 5 (Slc2a5), mRNA.	NM_031741.1	13929043	✔
0.00792751	1.45702	up	Fblim1	362650	filamin binding LIM protein 1 (Fblim1), mRNA.	NM_001007554.1	56090613	✔
0.0115289	1.46491	up	LOC306324	306324	tetraspanin TM4SF9 (predicted) (LOC306324), mRNA.	XM_224699.3	62662281	✔
0.00988756	1.46692	up	Cd302	295629	CD302 molecule (Cd302), mRNA.	NM_001013916.1	62078562	✔
0.00932874	1.4702	up	Trem2	301227	triggering receptor expressed on myeloid cells 2 (predicted) (Trem2_predicted), mRNA.	XM_217335.4	109485716	✔
0.025986	1.47215	up	Sparc	24791	secreted protein, acidic, cysteine-rich (osteonectin) (Sparc), mRNA.	NM_012656.1	6981573	✔
0.0487106	1.48352	up	Fos	314322	FBJ murine osteosarcoma viral oncogene homolog (Fos), mRNA.	NM_022197.1	63147419	✔
0.00655986	1.48711	up	Cklf	245978	chemokine-like factor (Cklf), mRNA.	NM_139111.1	20806162	✔
0.0057366	1.4895	up	Dbi	25045	diazepam binding inhibitor (Dbi), mRNA.	NM_031853.3	31560861	✔
0.00400626	1.49402	up	Laptm5	89783	lysosomal-associated protein transmembrane 5 (Laptm5), mRNA.	NM_053538.2	40254748	✔
0.00542049	1.50254	up	Clu	24854	clusterin (Clu), mRNA.	XM_001053033.1	109502529	✔
7.52454e-05	1.52087	up	Cda	362638	cytidine deaminase (predicted) (Cda_predicted), mRNA.	XM_342955.3	109475705	✔
0.00550483	1.52706	up	Irf1	24508	interferon regulatory factor 1 (Irf1), mRNA.	NM_012591.1	6981103	✔
0.00287606	1.53139	up	Ctgf	64032	connective tissue growth factor (Ctgf), mRNA.	NM_022266.2	78214357	✔
0.00391357	1.53618	up	Tmbim1	316516	transmembrane BAX inhibitor motif containing 1 (Tmbim1), mRNA.	NM_001007713.1	56090428	✔
0.000126613	1.53651	up	Bdh2	295458	3-hydroxybutyrate dehydrogenase, type 2 (predicted) (Bdh2_predicted), mRNA.	XM_001075590.1	109467583	✔
0.00316668	1.54473	up	Gchfr	171128	GTP cyclohydrolase I feedback regulator (Gchfr), mRNA.	NM_133595.1	19424299	✔
0.0102796	1.55015	up	LOC300760	300760	H3 histone, family 3B (LOC300760), mRNA.	XM_236308.3	62653977	✔
0.00191681	1.56194	up	Csf1	78965	colony stimulating factor 1 (macrophage) (Csf1), mRNA.	NM_023981.4	50054383	✔
0.031126	1.56307	up	Metrn	287151	meteorin, glial cell differentiation regulator (Metrn), mRNA.	NM_001009962.1	58000408	✔
0.00390738	1.56456	up	Rras	361568	Harvey rat sarcoma oncogene, subgroup R (predicted) (Rras_predicted), mRNA.	XM_001080661.1	109461901	✔
0.0250658	1.58396	up	Hspa2	60460	heat shock protein 2 (Hspa2), mRNA.	NM_021863.2	39725641	✔
0.00761024	1.59241	up	Ca3	54232	carbonic anhydrase 3 (Ca3), mRNA.	NM_019292.3	40538863	✔
0.000179859	1.59688	up	S100a1	295214	S100 calcium binding protein A1 (S100a1), mRNA.	NM_001007636.1	56090266	✔
0.0278869	1.61324	up	A2m	24153	alpha-2-macroglobulin (A2m), mRNA.	NM_012488.1	6978424	✔
0.039613	1.61486	up	Gltp	288707	glycolipid transfer protein (predicted) (Gltp_predicted), mRNA.	XM_001080376.1	109497488	✔
0.000133794	1.62021	up	Cyba	79129	cytochrome b-245, alpha polypeptide (Cyba), mRNA.	NM_024160.1	13162358	✔
0.00100637	1.63086	up	Hrasls3	24913	HRAS like suppressor 3 (Hrasls3), mRNA.	NM_017060.1	8393561	✔
0.00820752	1.64436	up	Ctss	50654	cathepsin S (Ctss), mRNA.	NM_017320.1	8393220	✔
0.0301389	1.66213	up	LOC301444	301444	pseudogene for diazepam binding inhibitor 1 (LOC301444), mRNA.	XM_237195.1	27683950	✔
0.00136065	1.67593	up	Anxa3	25291	annexin A3 (Anxa3), mRNA.	NM_012823.1	6978502	✔
0.00459648	1.69205	up	Naprt1	315085	nicotinate phosphoribosyltransferase domain containing 1 (Naprt1), mRNA.	NM_207609.1	46485386	✔
0.00709402	1.69807	up	Stat3	25125	signal transducer and activator of transcription 3 (Stat3), mRNA.	NM_012747.2	56799388	✔
0.000345493	1.71278	up	Hla-dmb	294273	major histocompatibility complex, class II, DM beta (Hla-dmb), mRNA.	NM_198740.1	38454215	✔
0.0409602	1.72494	up	Ifi27l	170512	interferon, alpha-inducible protein 27-like (Ifi27l), mRNA.	NM_203410.1	42821117	✔
0.00724084	1.73282	up	Sp110	301570	SP110 nuclear body protein (Sp110), mRNA.	NM_001034137.1	77628030	✔
0.0101667	1.73319	up	Hspb1	24471	heat shock 27kDa protein 1 (Hspb1), mRNA.	NM_031970.1	14010864	✔
0.0168508	1.74519	up	Rhoa	117273	ras homolog gene family, member A (Rhoa), mRNA.	NM_057132.2	54262176	✔
0.00379716	1.76006	up	Ube2l6	295704	ubiquitin-conjugating enzyme E2L 6 (Ube2l6), mRNA.	NM_001024755.1	67078501	✔
0.00505078	1.76325	up	Tnfrsf1a	25625	tumor necrosis factor receptor superfamily, member 1a (Tnfrsf1a), mRNA.	NM_013091.1	6981663	✔
0.0401027	1.78446	up	Spp1	25353	secreted phosphoprotein 1 (Spp1), mRNA.	NM_012881.1	6981579	✔
0.00605583	1.78838	up	S100a4	24615	S100 calcium-binding protein A4 (S100a4), mRNA.	NM_012618.1	6981325	✔
0.00455482	1.78984	up	LOC500297	500297	env precursor (LOC500297), mRNA.	XM_575645.1	62648048	✔
0.00208932	1.80291	up	C1qb	29687	complement component 1, q subcomponent, beta polypeptide (C1qb), mRNA.	NM_019262.1	9506432	✔
0.000680951	1.80368	up	Rarres2	297073	retinoic acid receptor responder (tazarotene induced) 2 (Rarres2), mRNA.	NM_001013427.1	61740620	✔
0.00752482	1.81351	up	LOC497841	497841	hypothetical gene supported by NM_016994 (LOC497841), mRNA.	XM_579384.1	62718644	✔
0.00525168	1.82146	up	Gbp2	171164	guanylate nucleotide binding protein 2 (Gbp2), mRNA.	NM_133624.1	19424349	✔
0.0252662	1.84689	up	Ifi27l	170512	interferon, alpha-inducible protein 27-like (Ifi27l), mRNA.	XM_579614.1	62651002	✔
0.000162364	1.84771	up	Qprt	293504	quinolinate phosphoribosyltransferase (Qprt), mRNA.	NM_001009646.1	57528251	✔
0.0407604	1.89495	up	Jak3	25326	Janus kinase 3 (Jak3), mRNA.	NM_012855.1	6981113	✔
0.00151514	1.94191	up	Carhsp1	260416	calcium regulated heat stable protein 1 (Carhsp1), mRNA.	NM_152790.2	50054307	✔
0.0101844	1.94598	up	Tagln2	304983	transgelin 2 (Tagln2), mRNA.	NM_001013127.1	61557027	✔
0.00383485	1.9506	up	Scara3	364405	scavenger receptor class A, member 3 (predicted) (Scara3_predicted), mRNA.	XM_344421.2	62661650	✔
0.00492651	1.96899	up	Cldn9	287099	claudin 9 (Cldn9), mRNA.	NM_001011889.1	58865347	✔
0.00609755	2.00449	up	Pdpn	54320	podoplanin (Pdpn), mRNA.	NM_019358.1	9506742	✔
0.000155176	2.19437	up	Aif1	29427	allograft inflammatory factor 1 (Aif1), mRNA.	NM_017196.2	78126174	✔
6.72877e-05	2.21075	up	Mgst1	171341	microsomal glutathione S-transferase 1 (Mgst1), mRNA.	NM_134349.2	54262182	✔
0.000843948	2.2344	up	Fabp7	80841	fatty acid binding protein 7, brain (Fabp7), mRNA.	NM_030832.1	13540629	✔
0.000299787	2.24003	up	B2m	24223	beta-2 microglobulin (B2m), mRNA.	NM_012512.1	7549745	✔
0.0174976	2.2407	up	C1r	312705	complement component 1, r subcomponent (C1r), mRNA.	XM_242644.4	109472560	✔
0.00244317	2.28391	up	Timp1	116510	TIMP metallopeptidase inhibitor 1 (Timp1), mRNA.	NM_053819.1	16758665	✔
0.00026841	2.36904	up	Tmem176b	171411	transmembrane protein 176B (Tmem176b), mRNA.	NM_134390.2	54262180	✔
0.0130233	2.3828	up	C2	24231	complement component 2 (C2), mRNA.	NM_172222.2	47575876	✔
0.00524128	2.46345	up	Igfbp2	25662	insulin-like growth factor binding protein 2 (Igfbp2), mRNA.	NM_013122.1	6981081	✔
0.0226642	2.57432	up	Chi3l1	89824	chitinase 3-like 1 (Chi3l1), mRNA.	NM_053560.1	61657900	✔
0.0119551	2.71574	up	LOC294942	294942	hypothetical LOC294942 (LOC294942), mRNA.	XM_215541.2	34855490	✔
0.000408667	2.73448	up	Psmb8	24968	proteasome (prosome, macropain) subunit, beta type 8 (large multifunctional peptidase 7) (Psmb8), mRNA.	NM_080767.1	18158432	✔
0.0172628	2.87343	up	isg12(b)	299269	putative ISG12(b) protein (isg12(b)), mRNA.	XM_001068101.1	109479854	✔
0.00382941	3.19941	up	Ifitm3	361673	interferon induced transmembrane protein 3 (Ifitm3), mRNA.	XM_341957.2	62641591	✔
0.00259857	3.33856	up	Ifi47	246208	interferon gamma inducible protein 47 (Ifi47), mRNA.	NM_172019.1	25282416	✔
0.00163177	3.50381	up	C1s	192262	complement component 1, s subcomponent (C1s), mRNA.	NM_138900.1	20302094	✔
0.00179576	3.6543	up	Serping1	295703	serine (or cysteine) peptidase inhibitor, clade G, member 1 (Serping1), mRNA.	NM_199093.1	40018557	✔
0.00542536	3.87155	up	Cfb	294257	complement factor B (Cfb), mRNA.	NM_212466.2	56799429	✔
0.00632643	4.42014	up	Gfap	24387	glial fibrillary acidic protein (Gfap), mRNA.	NM_017009.1	8393430	✔
0.00384935	4.51738	up	Lcn2	170496	lipocalin 2 (Lcn2), mRNA.	NM_130741.1	18543344	✔
0.0287976	1.20021	down	RGD1308872	291787	Retinoblastoma-binding protein 8 (RBBP-8) (CtBP interacting protein) (CtIP) (Retinoblastoma-interacting protein and myosin-like) (RIM) (predicted) (RGD1308872_predicted), mRNA.	XM_214620.4	109506302
0.000916172	1.20026	down	RGD1309403	310417	hypothetical protein FLJ12661 (predicted) (RGD1309403_predicted), mRNA.	XM_001057453.1	109466644
0.0111393	1.20093	down	Scly	363285	selenocysteine lyase (Scly), mRNA.	NM_001007755.1	56090260
0.0153219	1.20207	down	Lkap	170946	limkain b1 (Lkap), mRNA.	NM_133421.1	19173793
0.00125089	1.2027	down	Armc5	361653	armadillo repeat containing 5 (Armc5), mRNA.	NM_001009455.1	57164096
0.0416846	1.20309	down	Sorcs3	294043	sortilin-related VPS10 domain containing receptor 3 (predicted) (Sorcs3_predicted), mRNA.	XM_001060421.1	109463981
0.0109069	1.20446	down	RGD1311678	296311	4921517L17Rik protein (RGD1311678), misc RNA.	XR_009625.1	109471176
0.0260341	1.20451	down	RGD1566014	501661	Factor VIII associated protein (predicted) (RGD1566014_predicted), mRNA.	XM_001053469.1	109462280
0.00664707	1.20571	down	ST7	296911	suppression of tumorigenicity 7 (ST7), transcript variant 1, mRNA.	NM_001004102.1	51871602
0.0173171	1.20677	down	Pbx3	311876	pre B-cell leukemia transcription factor 3 (predicted) (Pbx3_predicted), mRNA.	XM_231158.4	109468048
0.00579403	1.20715	down	RGD1561042	498386	RIKEN cDNA 5730509K17 gene (predicted) (RGD1561042_predicted), mRNA.	XM_001055728.1	109500692
0.00838282	1.2073	down	LOC300173	300173	CG9996-PA (LOC300173), mRNA.	XM_217027.4	109481208
0.047884	1.20763	down	RGD1565431	499280	MAPK-interacting and spindle-stabilizing protein (predicted) (RGD1565431_predicted), mRNA.	XM_001057432.1	109463098
0.00911232	1.20767	down	RGD1561940	364686	KB07 protein (predicted) (RGD1561940_predicted), mRNA.	XR_007829.1	109505621
0.0372584	1.20789	down	RGD1307735	361898	hypothetical protein FLJ11795 (predicted) (RGD1307735_predicted), mRNA.	XM_001066855.1	109465930
0.0409773	1.20877	down	Stip1	192277	stress-induced phosphoprotein 1 (Stip1), mRNA.	NM_138911.2	40254729
0.0102287	1.20879	down	Ric8a	293614	resistance to inhibitors of cholinesterase 8 homolog A (C. elegans) (Ric8a), mRNA.	XM_215118.4	109459581
0.0108441	1.21028	down	LOC289378	289378	B0432.8 (LOC289378), mRNA.	XM_001066750.1	109499253
0.02708	1.21077	down	RGD1560080	497898	KID2 (predicted) (RGD1560080_predicted), mRNA.	XM_001072258.1	109490654
0.010611	1.21223	down	Cda08	171083	T-cell immunomodulatory protein (Cda08), mRNA.	NM_133557.1	19424235
0.0486482	1.21282	down	Galr2	29234	galanin receptor 2 (Galr2), mRNA.	NM_019172.3	34098960
0.00674706	1.21304	down	Prkacb	293508	protein kinase, cAMP dependent, catalytic, beta (predicted) (Prkacb_predicted), mRNA.	XM_215070.4	109465662
0.000784589	1.21346	down	Safb	64196	scaffold attachment factor B (Safb), mRNA.	NM_022394.1	11693163
0.00555798	1.21346	down	Fut8	432392	fucosyltransferase 8 (alpha (1,6) fucosyltransferase) (Fut8), mRNA.	NM_001002289.1	50511337
0.00562213	1.2139	down	As3mt	140925	arsenic (+3 oxidation state) methyltransferase (As3mt), mRNA.	NM_080890.1	18376836
0.0446322	1.21456	down	LOC361288	361288	FUN14 domain containing 2 (LOC361288), mRNA.	XM_341573.2	62664054
0.036701	1.21507	down	Dtymk	301622	deoxythymidylate kinase (predicted) (Dtymk_predicted), mRNA.	XM_001071259.1	109487532
0.0332578	1.21639	down	RGD1562252	315646	hypothetical gene supported by AK085276 (predicted) (RGD1562252_predicted), mRNA.	XM_236223.4	109483456
0.0135907	1.21709	down	RGD1560601	317432	Jumonji/ARID domain-containing protein 1C (SmcX protein) (predicted) (RGD1560601_predicted), mRNA.	XM_001064297.1	109511644
0.0359827	1.21711	down	Lipogenin	252964	Lipogenin (Lipogenin), mRNA.	NM_145790.1	21955163
0.0307477	1.21718	down	Dis3l	363077	DIS3 mitotic control homolog (S. cerevisiae)-like (Dis3l), mRNA.	NM_001008380.1	56605835
0.0273926	1.22003	down	Ccnl1	114121	cyclin L1 (Ccnl1), mRNA.	NM_053662.3	78126179
0.0189703	1.22015	down	RGD1309266	316335	RW1 protein (predicted) (RGD1309266_predicted), mRNA.	XM_237056.4	109485939
0.00183807	1.22105	down	Elmo1	361251	engulfment and cell motility 1, ced-12 homolog (C. elegans) (predicted) (Elmo1_predicted), mRNA.	XM_001059750.1	109505922
0.00559041	1.22324	down	Tlk2	303592	tousled-like kinase 2 (Arabidopsis) (predicted) (Tlk2_predicted), mRNA.	XM_221023.4	109489159
0.0233485	1.22397	down	Slc3a2	50567	solute carrier family 3 (activators of dibasic and neutral amino acid transport), member 2 (Slc3a2), mRNA.	NM_019283.1	9506890
0.00793029	1.22419	down	Lrrc17	502715	leucine rich repeat containing 17 (Lrrc17), mRNA.	NM_001025155.1	68342018
0.0106117	1.22477	down	Phka1	64561	phosphorylase kinase alpha 1 (Phka1), mRNA.	NM_022626.1	12018313
0.0434241	1.22495	down	Ptpn21	171070	protein tyrosine phosphatase, non-receptor type 21 (Ptpn21), mRNA.	NM_133545.1	19424211
0.0263503	1.22508	down	Nova1	298992	neuro-oncological ventral antigen 1, transcript variant 2 (Nova1), mRNA.	XM_234098.4	109478154
0.023786	1.22543	down	Epdr1	291180	ependymin related protein 1 (zebrafish) (Epdr1), mRNA.	NM_001007625.1	56090360
0.00304538	1.22602	down	Slc5a6	170551	solute carrier family 5 (sodium-dependent vitamin transporter), member 6 (Slc5a6), mRNA.	NM_130746.1	18543352
0.0124913	1.22826	down	Fbxl12	313782	F-box and leucine-rich repeat protein 12 (Fbxl12), mRNA.	NM_001025700.1	71043625
0.0371034	1.22898	down	Bbs2	113948	Bardet-Biedl syndrome 2 homolog (human) (Bbs2), mRNA.	NM_053618.1	16758415
0.0348839	1.22932	down	Hspa9a	291671	heat shock 70kDa protein 9A (predicted) (Hspa9a_predicted), mRNA.	XM_214583.4	109506396
0.00971825	1.23042	down	Slc46a3	288454	solute carrier family 46, member 3 (Slc46a3), mRNA.	NM_001024968.1	68163402
0.0278747	1.23123	down	LOC493574	493574	notch1-induced protein (LOC493574), mRNA.	NM_001008386.1	56605843
0.00872847	1.23237	down	Col7a1	301012	procollagen, type VII, alpha 1 (predicted) (Col7a1_predicted), mRNA.	XM_238554.4	109483965
0.0290463	1.23269	down	Kcnd2	65180	potassium voltage gated channel, Shal-related family, member 2 (Kcnd2), mRNA.	NM_031730.2	76881821
0.00122657	1.23284	down	Nars	291556	asparaginyl-tRNA synthetase (Nars), mRNA.	NM_001025635.1	71043733
0.000757026	1.23331	down	LOC315987	315987	mKIAA0800 protein (predicted) (LOC315987), mRNA.	XM_236612.3	62654310
0.0104867	1.23465	down	RGD1561042	498386	RIKEN cDNA 5730509K17 gene (predicted) (RGD1561042_predicted), mRNA.	XM_001055728.1	109500692
0.0216183	1.23585	down	Aars	292023	alanyl-tRNA synthetase (Aars), mRNA.	XM_001077503.1	109508903
0.00643573	1.23784	down	Rad51l3	303375	RAD51-like 3 (S. cerevisiae) (predicted) (Rad51l3_predicted), mRNA.	XM_220773.3	109488650
0.00306312	1.238	down	Pla2g4b	311341	phospholipase A2, group IVB (cytosolic) (predicted) (Pla2g4b_predicted), mRNA.	XM_230486.4	109468685
0.0375091	1.23818	down	LOC291840	291840	amino acid transporter (LOC291840), mRNA.	NM_001003705.1	51172595
0.0129687	1.23826	down	Ddx1	84474	DEAD (Asp-Glu-Ala-Asp) box polypeptide 1 (Ddx1), mRNA.	NM_053414.1	61097940
0.0334176	1.23837	down	Tor1aip1	246314	torsin A interacting protein 1 (Tor1aip1), mRNA.	NM_145092.2	77539437
0.0118329	1.23878	down	Ccnt2	304758	cyclin T2 (predicted) (Ccnt2_predicted), mRNA.	XM_001054848.1	109498559
0.0122258	1.23942	down	RGD1305239	295695	hypothetical protein (predicted) (RGD1305239_predicted), mRNA.	XM_230042.4	109468365
0.00302213	1.24112	down	Herc2	308669	hect (homologous to the E6-AP (UBE3A) carboxyl terminus) domain and RCC1 (CHC1)-like domain (RLD) 2 (predicted) (Herc2_predicted), mRNA.	XM_001054649.1	109462037
0.0205788	1.24155	down	Creg	289185	cellular repressor of E1A-stimulated genes (predicted) (Creg_predicted), mRNA.	XM_213921.3	62659636
0.00844884	1.24358	down	Vps18	296083	vacuolar protein sorting 18 (yeast) (predicted) (Vps18_predicted), mRNA.	XM_230471.3	109468666
0.0201155	1.24782	down	RGD1564957	313413	RIKEN cDNA 3110007P09 (predicted) (RGD1564957_predicted), mRNA.	XM_001058167.1	109476818
0.00418014	1.24844	down	Osbpl7	303497	oxysterol binding protein-like 7 (predicted) (Osbpl7_predicted), mRNA.	XM_220915.4	109488857
0.0102579	1.24986	down	Slc1a2	29482	solute carrier family 1 (glial high affinity glutamate transporter), member 2 (Slc1a2), transcript variant 1, mRNA.	NM_017215.2	78126166
0.0341191	1.25043	down	Exosc8	295050	exosome component 8 (predicted) (Exosc8_predicted), mRNA.	XM_215566.3	109464744
0.0112535	1.25275	down	Cry1	299691	cryptochrome 1 (photolyase-like) (Cry1), mRNA.	NM_198750.2	80861397
0.0141938	1.2537	down	Spg3a	362750	spastic paraplegia 3A homolog (human) (Spg3a), mRNA.	NM_001009831.2	58743308
0.00442228	1.25435	down	Tex10	298065	testis expressed gene 10 (predicted), transcript variant 3 (Tex10_predicted), mRNA.	XM_001054251.1	109476469
0.0491202	1.25594	down	Pcdh17	306055	protocadherin 17 (predicted) (Pcdh17_predicted), mRNA.	XM_224389.3	62661769
0.0195208	1.25614	down	Panx2	362979	pannexin 2 (Panx2), mRNA.	NM_199409.1	40786506
0.025404	1.25717	down	RGD1563873	313296	WD repeat domain 40B (predicted) (RGD1563873_predicted), mRNA.	XM_001067246.1	109512582
0.00831169	1.2572	down	Alms1	297408	Alstrom syndrome 1 (predicted) (Alms1_predicted), mRNA.	XM_001074073.1	109473826
0.0186686	1.25733	down	LOC288762			XM_213822.1	27710417
0.00757163	1.25902	down	Cnnm1	309387	cyclin M1 (predicted) (Cnnm1_predicted), mRNA.	XM_219879.4	109460141
0.0134192	1.25909	down	Crsp3	309565	cofactor required for Sp1 transcriptional activation, subunit 3 (Crsp3), mRNA.	XM_001057683.1	109457626
0.0127023	1.25913	down	Slc27a4	311839	solute carrier family 27 (fatty acid transporter), member 4 (Slc27a4), mRNA.	XM_231115.4	109467988
0.0493675	1.2596	down	Cdc2l5	306998	cell division cycle 2-like 5 (cholinesterase-related cell division controller), transcript variant 1 (Cdc2l5), mRNA.	XM_001053539.1	109505847
0.0337375	1.2608	down	LOC497922	497922	novel protein (LOC497922), mRNA.	XM_573109.1	62656213
0.0101892	1.26087	down	LOC367191	367191	Poly(rC)-binding protein 2 (Alpha-CP2) (Putative heterogeneous nuclear ribonucleoprotein X) (hnRNP X) (CTBP) (CBP) (LOC367191), mRNA.	XR_009207.1	109485617
0.0249784	1.26112	down	RGD1310685	362164	hypothetical protein D2Ertd391e (predicted) (RGD1310685_predicted), mRNA.	XM_001069036.1	109470252
0.0351039	1.26403	down	LOC499428	499428	LOC499428 (LOC499428), mRNA.	XM_579967.1	62665953
0.00732073	1.2649	down	Rab3gap2	289350	RAB3 GTPase activating protein subunit 2 (Rab3gap2), mRNA.	XM_001081955.1	109498336
0.0417383	1.26584	down	Tacr1	24807	tachykinin receptor 1 (Tacr1), mRNA.	NM_012667.1	6981627
0.00270969	1.26611	down	Dync1i2	116659	dynein cytoplasmic 1 intermediate chain 2 (Dync1i2), mRNA.	NM_053880.1	16758747
0.030344	1.2663	down	Vgf	29461	VGF nerve growth factor inducible (Vgf), mRNA.	NM_030997.1	13591863
0.012544	1.26643	down	Pde6c	361752	phosphodiesterase 6C, cGMP specific, cone, alpha prime (predicted) (Pde6c_predicted), mRNA.	XM_342046.3	109460054
0.0207809	1.26694	down	Raly	296301	RNA binding protein, autoantigenic (hnRNP-associated with lethal yellow homolog (mouse)) (Raly), mRNA.	NM_001011958.1	58865493
0.00750523	1.2688	down	LOC500974	500974	CDNA sequence BC024479 (LOC500974), misc RNA.	XR_009636.1	109484507
0.0333144	1.2699	down	RGD1561734	501201	KIAA1913 (predicted) (RGD1561734_predicted), mRNA.	XM_001054710.1	109487645
0.0181856	1.26999	down	Mast2	313819	microtubule associated serine/threonine kinase 2 (predicted) (Mast2_predicted), mRNA.	XM_001070900.1	109477058
0.00166189	1.27157	down	LOC497678	497678	hypothetical gene supported by NM_013192 (LOC497678), mRNA.	XM_579381.1	62657533
0.00572072	1.27267	down	RGD1311499	303744	hypothetical protein BC013995 (predicted) (RGD1311499_predicted), mRNA.	XM_221199.3	109489475
0.00637551	1.27276	down	Zfp110	308362	zinc finger protein 110 (Zfp110), mRNA.	NM_001024775.1	67078467
0.0137964	1.27282	down	LOC497843	497843	hypothetical gene supported by NM_053701 (LOC497843), mRNA.	XM_579572.1	62666579
0.019133	1.27359	down	Plaa	116645	phospholipase A2, activating protein (Plaa), mRNA.	NM_053866.2	27659721
0.0259957	1.27472	down	Rev1l	316344	REV1-like (S. cerevisiae) (predicted) (Rev1l_predicted), mRNA.	XM_237071.4	109485979
0.00143273	1.27598	down	RGD1311783	294012	RIKEN cDNA 2010012O05 (predicted) (RGD1311783_predicted), mRNA.	XM_001059424.1	109463961
0.00857765	1.27605	down	Fem1a	316131	feminization 1 homolog a (C. elegans) (Fem1a), mRNA.	NM_001025706.1	71043895
0.0265872	1.27629	down	Ttll1	362969	tubulin tyrosine ligase-like 1 (Ttll1), mRNA.	NM_001012200.1	58865971
0.0311959	1.27635	down	Psd	171381	pleckstrin and Sec7 domain containing, transcript variant 2 (Psd), mRNA.	XM_001070141.1	109460177
0.000469466	1.27788	down	RGD1565465	499956	Uridine-cytidine kinase 1-like 1 (predicted), transcript variant 1 (RGD1565465_predicted), mRNA.	XM_001070413.1	109469349
0.00677801	1.27817	down	RGD1561456	499155	Fanconi anemia, complementation group F (predicted) (RGD1561456_predicted), mRNA.	XM_001080926.1	109462004
0.012284	1.27876	down	LOC361091	361091	UDP-glucose ceramide glucosyltransferase-like 2 (LOC361091), mRNA.	XM_341376.2	62662039
0.00465582	1.27944	down	RGD1560320	361987	brain specific protein 4 (predicted) (RGD1560320_predicted), mRNA.	XM_342287.3	109465102
0.011187	1.2804	down	Xpot	314879	exportin, tRNA (nuclear export receptor for tRNAs) (predicted) (Xpot_predicted), mRNA.	XM_235185.4	109480609
0.0141479	1.28205	down	RGD1310383	304488	T-cell activation protein phosphatase 2C (predicted) (RGD1310383_predicted), mRNA.	XM_222189.4	109495913
0.0443293	1.28321	down	Slc24a3	85267	solute carrier family 24 (sodium/potassium/calcium exchanger), member 3 (Slc24a3), mRNA.	XM_001054941.1	109470941
0.0398118	1.28359	down	RGD1559924	499906	Eukaryotic translation initiation factor 1 (eIF1) (predicted) (RGD1559924_predicted), mRNA.	XR_007622.1	109470984
0.0113123	1.28469	down	nod3l	501101	NOD3-like protein (nod3l), mRNA.	NM_001024360.1	66730524
0.0130495	1.28984	down	Aldh3a2	65183	aldehyde dehydrogenase family 3, subfamily A2 (Aldh3a2), mRNA.	NM_031731.1	13929027
0.00185971	1.29233	down	Rttn	291377	rotatin (predicted) (Rttn_predicted), mRNA.	XM_214524.4	109506844
0.0483071	1.29324	down	Mto1	300852	mitochondrial translation optimization 1 homolog (S. cerevisiae) (predicted) (Mto1_predicted), mRNA.	XM_001060155.1	109485036
0.0127065	1.29516	down	RGD1565549	306254	polybromo-1 (predicted), transcript variant 7 (RGD1565549_predicted), mRNA.	XM_001059461.1	109503767
0.0210582	1.29788	down	Dyx1c1	363096	dyslexia susceptibility 1 candidate 1 homolog (human) (Dyx1c1), mRNA.	NM_001007010.1	55742716
0.00429116	1.29961	down	Ktn1	361029	kinectin 1 (predicted) (Ktn1_predicted), mRNA.	XM_341305.3	109501540
0.0310394	1.30183	down	Crocc	313663	ciliary rootlet coiled-coil, rootletin (predicted) (Crocc_predicted), mRNA.	XM_233603.4	109475744
0.00182991	1.3021	down	RGD1562076	501664	RIKEN cDNA 1810037C20 (predicted) (RGD1562076_predicted), mRNA.	XM_001054902.1	109462308
0.0446346	1.30283	down	Kpna4	361959	karyopherin alpha 4 (importin alpha 3) (Kpna4), mRNA.	NM_001014793.1	62339365
0.0139682	1.30383	down	Zfp184	306966	zinc finger protein 184 (Kruppel-like) (predicted) (Zfp184_predicted), mRNA.	XM_001062127.1	109505982
0.0201495	1.30747	down	Pak7	311450	p21 (CDKN1A)-activated kinase 7 (predicted) (Pak7_predicted), mRNA.	XM_001080088.1	109470755
0.0241219	1.30776	down	Pdp2	246311	pyruvate dehydrogenase phosphatase isoenzyme 2 (Pdp2), mRNA.	NM_145091.3	48675864
0.0023094	1.30836	down	RGD1307935	360583	Hypothetical protein MGC18716 (RGD1307935), mRNA.	NM_001014119.1	62078974
0.0256399	1.30965	down	Aasdhppt	300328	aminoadipate-semialdehyde dehydrogenase-phosphopantetheinyl transferase (predicted) (Aasdhppt_predicted), mRNA.	XM_217078.3	62653188
0.0245937	1.31004	down	Deadc1	361453	deaminase domain containing 1 (predicted) (Deadc1_predicted), mRNA.	XM_341731.2	62638235
0.0488824	1.31072	down	Inha	24504	inhibin alpha (Inha), mRNA.	NM_012590.1	6981101
0.0122622	1.31147	down	LOC311496	311496	hypothetical LOC311496 (predicted) (LOC311496), mRNA.	XM_230651.3	62645982
0.0412664	1.31529	down	Gabrr2	29695	gamma-aminobutyric acid (GABA) receptor, rho 2 (Gabrr2), mRNA.	NM_017292.1	8393402
0.018844	1.31653	down	Faim2	246274	Fas apoptotic inhibitory molecule 2 (Faim2), mRNA.	NM_144756.2	56799424
0.0411759	1.31734	down	RGD1560183	290501	hypothetical protein FLJ14624 (predicted) (RGD1560183_predicted), mRNA.	XM_001079115.1	109502975
0.00240887	1.32058	down	LOC680665	680665	Fc receptor-like protein 1 (LOC680665), mRNA.	XM_001058249.1	109465029
0.013154	1.32358	down	Mrc2	295631	mannose receptor, C type 2 (predicted) (Mrc2_predicted), mRNA.	XM_001069062.1	109469947
0.00747464	1.32392	down	RGD1566155	501658	2610030H06Rik protein (predicted) (RGD1566155_predicted), mRNA.	XM_577054.2	109511285
0.0457762	1.32433	down	Epn1	117277	Epsin 1 (Epn1), mRNA.	NM_057136.1	16923989
2.47436e-05	1.32462	down	Hpse	64537	heparanase (Hpse), mRNA.	NM_022605.1	12018275
0.0108681	1.32748	down	Adamts7	315879	a disintegrin-like and metallopeptidase (reprolysin type) with thrombospondin type 1 motif, 7 (predicted) (Adamts7_predicted), mRNA.	XM_236471.4	109483762
0.0445736	1.33055	down	Wdtc1	313020	WD and tetratricopeptide repeats 1 (predicted) (Wdtc1_predicted), mRNA.	XM_232730.4	109475611
0.0237195	1.33434	down	LOC498675	498675	hypothetical LOC498675 (LOC498675), mRNA.	XM_573957.2	109503660
0.00099177	1.34184	down	Inpp5b	362590	inositol polyphosphate-5-phosphatase B (Inpp5b), mRNA.	XM_001056372.1	109477202
0.00466865	1.34793	down	Hr	60563	hairless homolog (mouse) (Hr), mRNA.	NM_024364.1	13242256
0.00500683	1.34803	down	Trrap	288471	transformation/transcription domain-associated protein (predicted) (Trrap_predicted), mRNA.	XM_001071336.1	109496591
0.00289618	1.35622	down	LOC501102	501102	LOC501102 (LOC501102), mRNA.	XM_580161.1	62654718
0.0288993	1.35696	down	Rpgrip1	305850	retinitis pigmentosa GTPase regulator interacting protein 1 (Rpgrip1), mRNA.	XM_001074342.1	109501584
0.00203587	1.35716	down	Nexn	246172	nexilin (F actin binding protein) (Nexn), transcript variant b, mRNA.	NM_139231.1	40538873
0.000881044	1.35828	down	Herc3	362377	hect domain and RLD 3 (predicted) (Herc3_predicted), mRNA.	XM_342701.2	62647351
0.0123657	1.3597	down	Eif2s2	296302	eukaryotic translation initiation factor 2, subunit 2 (beta) (Eif2s2), mRNA.	NM_199380.1	40786450
0.00379235	1.36174	down	Myh7b	311570	myosin, heavy polypeptide 7B, cardiac muscle, beta (predicted) (Myh7b_predicted), mRNA.	XM_230774.4	109469094
0.00480195	1.36315	down	Lonrf2	301361	LON peptidase N-terminal domain and ring finger 2 (predicted) (Lonrf2_predicted), mRNA.	XM_001058206.1	109487012
0.0301778	1.36324	down	Trove2	304833	TROVE domain family, member 2 (predicted) (Trove2_predicted), mRNA.	XM_222686.4	109497953
0.00579449	1.36326	down	Cntrob	303240	centrobin, centrosomal BRCA2 interacting protein (predicted) (Cntrob_predicted), mRNA.	XM_220600.4	109488276
0.0422892	1.36992	down	LOC306137	306137	CG10084-PA (predicted) (LOC306137), mRNA.	XM_224510.3	62661826
0.0256811	1.37004	down	Ppara	25747	peroxisome proliferator activated receptor alpha (Ppara), mRNA.	NM_013196.1	6981381
0.000335173	1.37406	down	Acaca	60581	acetyl-coenzyme A carboxylase alpha (Acaca), mRNA.	NM_022193.1	11559961
0.0194524	1.38057	down	Pde6a	307401	phosphodiesterase 6A, cGMP-specific, rod, alpha (predicted) (Pde6a_predicted), mRNA.	XM_225895.4	109506688
0.000783467	1.40181	down	Ccng1	25405	cyclin G1 (Ccng1), mRNA.	NM_012923.1	6978620
4.65055e-05	1.40214	down	Slc6a9	116509	solute carrier family 6 (neurotransmitter transporter, glycine), member 9 (Slc6a9), mRNA.	NM_053818.1	16758663
0.0110945	1.40957	down	Trps1	299897	trichorhinophalangeal syndrome I (predicted) (Trps1_predicted), mRNA.	XM_235264.3	62652412
0.00698848	1.41759	down	Lrrc8d	305131	leucine rich repeat containing 8 family, member D (Lrrc8d), mRNA.	NM_001008338.1	56605753
0.0031974	1.4209	down	RGD1308957	364204	cDNA sequence BC027127; 9330184N17Rik (predicted) (RGD1308957_predicted), mRNA.	XM_001054111.1	109501015
0.00332428	1.45496	down	Yars	313047	tyrosyl-tRNA synthetase (Yars), mRNA.	NM_001025696.1	71043617
0.0182283	1.45697	down	Map2	25595	microtubule-associated protein 2 (Map2), mRNA.	NM_013066.1	6981181
0.00177373	1.46714	down	Mpp2	85275	membrane protein, palmitoylated 2 (MAGUK p55 subfamily member 2) (Mpp2), mRNA.	XM_340912.3	109489073
0.0470748	1.4673	down	Sox4	364712	SRY-box containing gene 4 (predicted) (Sox4_predicted), mRNA.	XM_001068302.1	109505727
0.00187815	1.46968	down	Vegfa	83785	vascular endothelial growth factor A (Vegfa), mRNA.	NM_031836.1	13929197
0.00268424	1.47927	down	Cars	293638	cysteinyl-tRNA synthetase (predicted) (Cars_predicted), mRNA.	XM_001065753.1	109463259
0.0311862	1.50181	down	LOC497853	497853	ATP-binding cassette, sub-family C (CFTR/MRP), member 1 (LOC497853), mRNA.	XM_573034.1	62655589
0.0014168	1.50713	down	Opn4	192223	opsin 4 (Opn4), mRNA.	NM_138860.1	20302015
0.0016907	1.53254	down	Slc7a5	50719	solute carrier family 7 (cationic amino acid transporter, y+ system), member 5 (Slc7a5), mRNA.	NM_017353.1	8394404
0.0190805	1.53622	down	Etv4	360635	ets variant gene 4 (E1A enhancer binding protein, E1AF) (predicted) (Etv4_predicted), mRNA.	XM_340910.3	109489056
0.0281647	1.53876	down	Nos3	24600	nitric oxide synthase 3, endothelial cell (Nos3), mRNA.	NM_021838.2	46409655
0.00464108	1.54175	down	Gars	297113	glycyl-tRNA synthetase (Gars), mRNA.	XM_216152.4	109472086
0.0107537	1.56633	down	Slc7a1	25648	solute carrier family 7 (cationic amino acid transporter, y+ system), member 1 (Slc7a1), mRNA.	NM_013111.1	6981555
0.0266412	1.59156	down	RGD1307355	311825	gene model 711 (RGD1307355), mRNA.	XM_231122.4	109467941
0.0002865	1.59405	down	Mars	299851	methionine-tRNA synthetase (predicted) (Mars_predicted), mRNA.	XM_216910.3	62652266
0.00145253	1.60892	down	Tars	294810	threonyl-tRNA synthetase (Tars), mRNA.	NM_001006976.1	55741822
0.01461	1.61051	down	Eif4ebp1	116636	eukaryotic translation initiation factor 4E binding protein 1 (Eif4ebp1), mRNA.	NM_053857.1	16758723
0.00168705	1.61405	down	Pycs	361755	pyrroline-5-carboxylate synthetase (glutamate gamma-semialdehyde synthetase) (predicted) (Pycs_predicted), mRNA.	XM_342048.3	109460070
0.000507068	1.63944	down	Lamc2	192362	lamimin, gamma 2 (Lamc2), mRNA.	XM_213902.4	109498027
0.00566624	1.64568	down	Espn	56227	espin (Espn), mRNA.	NM_019622.1	9665228
0.000151593	1.66694	down	Iars	306804	isoleucine-tRNA synthetase (predicted) (Iars_predicted), mRNA.	XM_001055989.1	109505544
0.000407198	1.66845	down	Lars	291624	leucyl-tRNA synthetase (Lars), mRNA.	NM_001009637.1	57526926
0.010172	1.76883	down	Pax4	83630	paired box gene 4 (Pax4), mRNA.	NM_031799.1	13929131
0.0068091	1.77459	down	Eif1ad	293673	eukaryotic translation initiation factor 1A domain containing (Eif1ad), mRNA.	NM_001008305.1	56605691
0.00137844	2.1298	down	Asns	25612	asparagine synthetase (Asns), mRNA.	NM_013079.1	21630290
0.00275629	2.89723	down	Chac1	362196	ChaC, cation transport regulator-like 1 (E. coli) (predicted) (Chac1_predicted), mRNA.	XM_342497.3	109468669
0.00824364	1.20253	up	LOC313245	313245	RNA polymerase I associated factor (PAF53) (LOC313245), mRNA.	XM_233004.3	62648918
0.000589268	1.20339	up	RGD1308581	360906	RIKEN cDNA 2900024C23 (predicted) (RGD1308581_predicted), mRNA.	XM_001060943.1	109500228
0.00162256	1.20366	up	Adra1b	24173	adrenergic, alpha-1B-, receptor (Adra1b), mRNA.	NM_016991.2	47575852
0.00435785	1.20382	up	Arf3	140940	ADP-ribosylation factor 3 (Arf3), mRNA.	NM_080904.2	57527932
0.00820044	1.20398	up	Slc39a7	294281	solute carrier family 39 (zinc transporter), member 7 (Slc39a7), mRNA.	NM_001008885.1	57114293
0.0492152	1.2041	up	Snca	29219	synuclein, alpha (non A4 component of amyloid precursor) (Snca), mRNA.	NM_019169.2	56799400
0.0238907	1.20572	up	RGD1566396	500710	RIKEN cDNA D230037D09 gene (predicted) (RGD1566396_predicted), mRNA.	XM_001067433.1	109479840
0.0159707	1.20573	up	Tepp	291850	testis/prostate/placenta-expressed protein (Tepp), mRNA.	NM_201655.1	42538985
0.0140992	1.20594	up	RGD1310931	290642	hypothetical protein BC013949 (predicted) (RGD1310931_predicted), mRNA.	XM_001066312.1	109503924
0.0211907	1.20728	up	Sdc4	24771	syndecan 4 (Sdc4), mRNA.	NM_012649.1	6981521
0.00082616	1.20734	up	Sepw1	25545	selenoprotein W, muscle 1 (Sepw1), mRNA.	NM_013027.1	6981525
0.00146921	1.21328	up	Haghl	302995	hydroxyacylglutathione hydrolase-like (Haghl), mRNA.	XM_001060358.1	109490393
0.00128839	1.21347	up	Mapk3	50689	mitogen activated protein kinase 3 (Mapk3), mRNA.	XM_001079997.1	109462881
0.0402098	1.21662	up	Rhpn1	300030	rhophilin, Rho GTPase binding protein 1 (predicted) (Rhpn1_predicted), mRNA.	XM_216954.4	109480880
0.00625133	1.21693	up	Hsd17b13	305150	hydroxysteroid (17-beta) dehydrogenase 13 (Hsd17b13), mRNA.	XM_001065370.1	109500297
0.0187605	1.21879	up	Renbp	81759	renin binding protein (Renbp), mRNA.	NM_031095.1	13592042
0.00679863	1.22326	up	Itgb1bp1	298914	integrin beta 1 binding protein 1 (predicted) (Itgb1bp1_predicted), mRNA.	XM_001070826.1	109479108
0.0172557	1.22369	up	Ccl19	362506	chemokine (C-C motif) ligand 19 (predicted) (Ccl19_predicted), mRNA.	XM_342824.2	62648837
0.0181398	1.22493	up	RGD1306991	362220	Protein C20orf103 precursor (RGD1306991), mRNA.	NM_001014183.1	62079100
0.037136	1.22626	up	Bmper	300455	BMP-binding endothelial regulator (predicted) (Bmper_predicted), mRNA.	XM_001053312.1	109484394
0.00249411	1.22675	up	RGD1307636	363886	hypothetical protein MGC40499 (predicted) (RGD1307636_predicted), mRNA.	XM_001075687.1	109496764
0.00794644	1.22769	up	LOC498958	498958	LOC498958 (LOC498958), mRNA.	XM_579893.1	62665353
0.0419553	1.22858	up	Gtf2e2	306516	general transcription factor II E, polypeptide 2 (beta subunit) (predicted) (Gtf2e2_predicted), mRNA.	XM_224929.4	109503468
0.0260391	1.23441	up	Nupr1	113900	nuclear protein 1 (Nupr1), mRNA.	NM_053611.1	16758405
0.00133899	1.2349	up	LOC500227	500227	hypothetical gene supported by BC079424 (LOC500227), mRNA.	NM_001024330.1	66730263
0.0217215	1.2355	up	Cd99	652929	CD99 antigen (Cd99), mRNA.	XM_001061998.1	109510245
0.0432811	1.23948	up	Fkbp5	361810	FK506 binding protein 5 (Fkbp5), mRNA.	NM_001012174.1	58865919
0.0127339	1.24015	up	RGD1305038	314627	Serine/threonine-protein kinase SNK (Serum inducible kinase) (predicted) (RGD1305038_predicted), mRNA.	XM_001076512.1	109481573
0.041014	1.2414	up	Cxxc5	291670	CXXC finger 5 (Cxxc5), mRNA.	NM_001007628.1	56090603
0.00456004	1.24174	up	RGD1565646	499593	SOX2 protein (predicted) (RGD1565646_predicted), mRNA.	XM_574919.2	109464742
0.0366519	1.24618	up	RGD1304876	362368	RIKEN cDNA A030007L17; EST AA673177 (predicted) (RGD1304876_predicted), mRNA.	XM_342693.3	109472069
0.041479	1.2492	up	LOC679898	679898	zinc finger, matrin type 2 (LOC679898), mRNA.	XM_001054881.1	109506457
0.00262939	1.25312	up	Slc1a5	292657	solute carrier family 1 (neutral amino acid transporter), member 5 (Slc1a5), mRNA.	NM_175758.3	51592103
0.0458456	1.25346	up	Ccdc51	316008	coiled-coil domain containing 51 (Ccdc51), mRNA.	NM_001014098.1	62078928
4.42643e-05	1.25533	up	RGD1308059	362535	DNA segment, Chr 4, Brigham & Womens Genetics 0951 expressed (RGD1308059), mRNA.	NM_001025022.1	68163482
0.048051	1.25901	up	Adk	25368	adenosine kinase (Adk), mRNA.	NM_012895.3	52345434
0.00493769	1.26318	up	Qscn6	84491	quiescin Q6 (Qscn6), mRNA.	NM_053431.1	16758171
0.0219358	1.26428	up	Slc19a1	29723	solute carrier family 19 (folate transporter), member 1 (Slc19a1), transcript variant 1, mRNA.	NM_017299.1	8394282
0.0339967	1.27029	up	LOC362665	362665	KIAA0833 protein (LOC362665), mRNA.	XM_342982.2	62650071
0.0235579	1.27272	up	LOC499779	499779	RIKEN cDNA 2900010J23 (LOC499779), mRNA.	XM_575112.2	109468043
0.000531563	1.27291	up	LOC500656	500656	L-long term repeat (LOC500656), mRNA.	XM_576034.1	62650734
0.0200483	1.27794	up	Zfp628	361500	zinc finger protein 628 (predicted) (Zfp628_predicted), mRNA.	XM_341779.3	109458115
0.000748301	1.28101	up	Ncf1	114553	neutrophil cytosolic factor 1 (Ncf1), mRNA.	NM_053734.2	40254741
0.0332426	1.28105	up	Tspan12	362326	tetraspanin 12 (Tspan12), mRNA.	NM_001015026.1	62543542
0.0353328	1.28325	up	RGD1306356	303740	hypothetical protein MGC15523 (RGD1306356), mRNA.	XM_221195.4	109489465
0.0286641	1.28564	up	RGD1309631	300215	lipocalin-interacting membrane receptor (predicted) (RGD1309631_predicted), mRNA.	XM_217044.3	62653032
0.045542	1.28831	up	Plxnb1	316009	plexin B1 (predicted) (Plxnb1_predicted), mRNA.	XM_236640.4	109483969
0.00454993	1.29722	up	Jund	24518	Jun D proto-oncogene (Jund), mRNA.	XM_001070425.1	109503977
0.000611463	1.30054	up	RGD1309543	361790	2310014H01Rik protein (predicted) (RGD1309543_predicted), mRNA.	XM_001072744.1	109509683
0.0012571	1.30175	up	Mvp	64681	major vault protein (Mvp), mRNA.	NM_022715.2	41055864
0.00934248	1.30246	up	Olr1566	287973	olfactory receptor 1566 (Olr1566), mRNA.	NM_001000044.1	47576402
0.00512257	1.30518	up	RGD1560851	362428	mKIAA1238 protein (predicted) (RGD1560851_predicted), mRNA.	XM_342749.3	109472533
0.00276765	1.30695	up	Nags	303563	N-acetylglutamate synthase (predicted) (Nags_predicted), mRNA.	XM_220939.3	62657101
0.0471471	1.31824	up	RGD1562933	501454	product is unknown~seizure-related gene (predicted) (RGD1562933_predicted), mRNA.	XR_009104.1	109484900
0.00243395	1.32869	up	Prss23	308807	protease, serine, 23 (Prss23), mRNA.	NM_001007691.1	56090286
0.0321296	1.32935	up	Dclre1c	259171	DNA cross-link repair 1C, PSO2 homolog (S. cerevisiae) (Dclre1c), mRNA.	NM_147145.1	22129750
0.0313102	1.3322	up	Tfpi2	286926	tissue factor pathway inhibitor 2 (Tfpi2), mRNA.	NM_173141.1	27465612
0.011139	1.3404	up	Eml2	192360	echinoderm microtubule associated protein like 2 (Eml2), mRNA.	NM_138921.1	20302130
0.00796343	1.36431	up	RGD1563940	500132	phosphoinositol 4-phosphate adaptor protein-2 (predicted) (RGD1563940_predicted), mRNA.	XM_575484.2	109472080
0.00355454	1.37141	up	Naaa	497009	N-acylethanolamine acid amidase (Naaa), mRNA.	NM_001010967.2	77736613
0.026343	1.37566	up	Gpha2	171158	glycoprotein hormone alpha 2 (Gpha2), mRNA.	NM_133619.2	24475801
0.0081035	1.37677	up	Pdyn	29190	prodynorphin (Pdyn), mRNA.	NM_019374.2	31083335
0.00471353	1.38547	up	Arrdc1	366001	arrestin domain containing 1 (Arrdc1), mRNA.	XM_001071550.1	109469414
0.0387646	1.39028	up	Nsun2	361191	NOL1/NOP2/Sun domain family, member 2 (predicted) (Nsun2_predicted), mRNA.	XM_001057743.1	109460641
0.00607272	1.39909	up	Anxa4	79124	annexin A4 (Anxa4), mRNA.	NM_024155.3	55742831
0.0420548	1.39964	up	Slc11a2	25715	solute carrier family 11 (proton-coupled divalent metal ion transporters), member 2 (Slc11a2), mRNA.	NM_013173.1	6981287
0.0077183	1.40147	up	Serpinb1a	291091	serine (or cysteine) proteinase inhibitor, clade B, member 1a (Serpinb1a), mRNA.	NM_001031642.1	72255514
0.00325708	1.40946	up	Glrx1	64045	glutaredoxin 1 (thioltransferase) (Glrx1), mRNA.	NM_022278.1	11560104
0.0279323	1.41001	up	Rcn3	494125	reticulocalbin 3, EF-hand calcium binding domain (predicted) (Rcn3_predicted), mRNA.	NM_001008694.1	56744248
0.0449461	1.41745	up	Tle3	84424	transducin-like enhancer of split 3 (E(sp1) homolog, Drosophila) (Tle3), mRNA.	NM_053400.1	16758125
0.0140506	1.42949	up	Cldn5	65131	claudin 5 (Cldn5), mRNA.	NM_031701.2	82524854
0.00843744	1.43491	up	Tead3	294299	TEA domain family member 3 (Tead3), mRNA.	XM_001078363.1	109509838
0.0344085	1.48345	up	LOC681314	681314	BAX protein, cytoplasmic isoform delta, transcript variant 2 (LOC681314), mRNA.	XM_001061020.1	109489050
0.00230115	1.48455	up	Cnp	25275	2',3'-cyclic nucleotide 3' phosphodiesterase (Cnp), mRNA.	NM_012809.1	57977322
0.00734718	1.48547	up	Tnfrsf12a	302965	tumor necrosis factor receptor superfamily, member 12a (Tnfrsf12a), mRNA.	NM_181086.2	54262185
0.0358219	1.51107	up	LOC682159	682159	guanine nucleotide binding protein 13, gamma (LOC682159), mRNA.	XM_001060179.1	109490379
0.0499226	1.52075	up	RGD1565319	309161	Delta-interacting protein A (Hepatitis delta antigen interacting protein A) (predicted) (RGD1565319_predicted), mRNA.	XM_001070153.1	109463373
0.0302059	1.53565	up	Kifc1	294286	kinesin family member C1 (Kifc1), mRNA.	NM_001005878.1	54312051
0.021159	1.53708	up	Slc26a6	301010	solute carrier family 26, member 6 (predicted) (Slc26a6_predicted), mRNA.	XM_217275.3	62654330
0.0491836	1.53975	up	LOC309197	309197	hypothetical protein (LOC309197), mRNA.	XM_219560.3	62641847
0.0126291	1.54642	up	Tnip2	305451	TNFAIP3 interacting protein 2 (Tnip2), mRNA.	NM_001024771.1	67078475
0.0460797	1.54685	up	Hnrnph2	308650	heterogeneous nuclear ribonucleoprotein H2 (H') (Hnrnph2), mRNA.	NM_001014019.1	62078768
0.0319001	1.56947	up	Cxcl16	497942	chemokine (C-X-C motif) ligand 16 (Cxcl16), mRNA.	NM_001017478.1	62945311
0.0328419	1.58554	up	Dhrs4	266686	dehydrogenase/reductase (SDR family) member 4 (Dhrs4), mRNA.	NM_153315.2	76781469
0.0331831	1.62122	up	Tf	24825	transferrin (Tf), mRNA.	NM_001013110.1	61556985
0.0427906	1.64618	up	Rpl31	64298	ribosomal protein L31 (Rpl31), mRNA.	NM_022506.2	54262169
0.00964154	1.64774	up	Nxn	360577	nucleoredoxin (predicted), transcript variant 2 (Nxn_predicted), mRNA.	XM_001080610.1	109491337
0.000838953	1.65754	up	Lamp3	303801	lysosomal-associated membrane protein 3 (Lamp3), mRNA.	NM_001012015.1	58865599
0.0421145	1.70517	up	RGD1309216	361726	hypothetical protein FLJ20487 (RGD1309216), mRNA.	NM_001008371.1	56605817
0.000543468	1.81401	up	RGD1560911	309112	BC026645 protein (predicted) (RGD1560911_predicted), mRNA.	XM_001062704.1	109463194
0.018232	1.83752	up	RGD1565000	499570	Myelin P2 protein (predicted) (RGD1565000_predicted), mRNA.	XM_574894.2	109464597
0.0279128	1.86429	up	RGD1565487	292625	RGD1565487 (predicted) (RGD1565487_predicted), mRNA.	XM_001073994.1	109461286
0.0314435	1.87804	up	LOC368070	368070	Pinin (LOC368070), mRNA.	XM_001079732.1	109479425
0.000937799	1.89434	up	LOC362480	362480	lipoxygenase homology domains 1 (LOC362480), mRNA.	XM_347058.2	62648578
0.0458245	1.98782	up	Ddb1	64470	damage-specific DNA binding protein 1 (Ddb1), mRNA.	XM_342024.2	62641503
0.00678525	1.98895	up	Rhebl1	359959	Ras homolog enriched in brain like 1 (Rhebl1), mRNA.	NM_182825.1	33414520
0.00174248	2.11278	up	Rasip1	292912	Ras interacting protein 1 (predicted) (Rasip1_predicted), mRNA.	XM_001080759.1	109461939
0.0238038	2.13088	up	Klc3	171549	kinesin light chain 3 (Klc3), mRNA.	NM_138520.1	19924048
0.00441299	2.13123	up	Mlc1	315215	megalencephalic leukoencephalopathy with subcortical cysts 1 homolog (human) (predicted) (Mlc1_predicted), mRNA.	XM_235558.4	109481167
Microarray analysis of the retinal transcriptome from diabetic rats that received or not subconjunctival insulin or systemic phloridzin treatment for the last 4 days (n=4; ✔ reversed by more than 50% compared to untreated diabetic; ✓ reversed by less than 50% compared to untreated diabetic)
